**Long Title:** The mammalian rod synaptic ribbon is essential for Ca<sub>v</sub> channel facilitation and ultrafast fusion of the readily releasable pool of vesicles

## Authors

Chad Paul Grabner<sup>1,2,\*</sup> and Tobias Moser<sup>1-4</sup>

<sup>1</sup>*Institute for Auditory Neuroscience and InnerEarLab, University Medical Center Göttingen, Göttingen, Germany*

<sup>2</sup>*Synaptic Nanophysiology Group, Max Planck Institute of Biophysical Chemistry, 37077 Göttingen, Germany*

<sup>3</sup>*Collaborative Research Center 889, University of Göttingen, Göttingen, Germany*

<sup>4</sup>*Multiscale Bioimaging Cluster of Excellence (MBExC), University of Göttingen, 37075 Göttingen, Germany*

*\*corresponding author's email: [chadgrabner@gmail.com](mailto:chadgrabner@gmail.com)*

## Abstract

Rod photoreceptors (PRs) use ribbon synapses to transmit visual information. To signal 'no light detected' they release glutamate continually to activate post-synaptic receptors, and when light is detected glutamate release pauses. How a rod's individual ribbon enables this process was studied here by recording evoked changes in whole-cell membrane capacitance from wild type and ribbonless (RIBEYE-ko) rods. Wild type rods created a readily releasable pool (RRP) of 92 synaptic vesicles (SVs) that emptied as a single kinetic phase with a  $\tau < 0.4$  msec. Lowering intracellular  $\text{Ca}^{2+}$ -buffering accelerated  $\text{Ca}_v$  channel opening and facilitated release kinetics, but RRP size was unaltered. In contrast, ribbonless rods created an RRP of 24 SVs, and lacked  $\text{Ca}_v$  channel facilitation; however,  $\text{Ca}^{2+}$  channel-release coupling remained tight. The release deficits caused a sharp attenuation of rod-driven light responses measured from RIBEYE-ko mice. We conclude that the synaptic ribbon facilitates  $\text{Ca}^{2+}$ -influx and establishes a large RRP of SVs.

## Introduction

Animals use their sensory systems to interact with and navigate through their environment, and sensory maps are created for this purpose. This is especially true for vision, where perception of a real-world scene invariably asserts the location of objects in space. The building blocks for visual percepts originate from a visual field that is often in motion, and can vary greatly in light levels. Therefore, vertebrates have evolved complex processes that stabilize the eyes on the visual field (Straka and Baker, 2013), focus images on the back of the eye, and transform light of varying intensities into neural signals (Rivlin-Etzion et al., 2018).

The neural retina lines the concaved inner surface of the eye, and it is a thin, multi-layered network. The outer most layer is a dense lawn of photoreceptors ( $PR > 1 \times 10^5 \text{ mm}^{-2}$ ) (Grunert and Martin, 2020). Each PR has a photosensitive outer segment, and at its opposite pole a single synaptic terminal forms in the first synaptic layer of the retina, the Outer Plexiform Layer (OPL). There are two classes of PRs in the outer retina: rods and cones. They make very distinct connections to the inner retina (Behrens et al., 2016; Tsukamoto and Omi, 2016, 2017), the rods are  $\sim 10^3$ -fold more sensitive to light than cones (Cao et al., 2014; Grimes et al., 2018), and in most mammals rods outnumber cones by 30:1 (Grunert and Martin, 2020). In the primate retina, the rod-dominant region is referred to as 'peripheral retina', occupies 95 % of the retinal area, and supports low acuity vision (e.g., peripheral vision) (Sterling, 2013); whereas, the cone-dominant 'central retina' supports high acuity, color-sensitive vision (Thoreson and Dacey, 2019).

Both rods and cones form 'ribbon synapses' that are named after the electron-dense plate that projects from the presynaptic AZ into the cytoplasm. A subset of vertebrate sensory neurons express the protein RIBEYE, which is localized to ribbons (reviews, Lagnado and Schmitz, 2015; Moser et al., 2019). Deletion of RIBEYE eliminates synaptic ribbons (Maxeiner et al., 2016). So far, studies carried out on ribbonless bipolar cells and auditory inner hair cells have not identified a unifying role for the ribbon. Evoked release from ribbonless bipolars was greatly reduced, though  $\text{Ca}^{2+}$  currents were normal (Maxeiner et al., 2016). In contrast, ribbonless hair cells showed a milder impairment in exocytosis (Becker et al., 2018; Jean et al., 2018), and they produced well defined substitute AZs that may be better at compensating for loss of ribbons (Jean et al., 2018). These studies suggest that only the synaptic ribbons in the inner retina have a prominent role in vesicle fusion, where ribbons are proposed to physically shorten the coupling of  $\text{Ca}_v$  channels to SVs (Maxeiner et al., 2016).

How the ribbon influences transmitter release from mammalian PRs has not been tested directly, and in addition, relatively little is known about the biophysics of exocytosis from mammalian PRs.

Mammalian rods express a single, large horseshoe-shaped ribbon that surrounds one or two ON-bipolar dendrites that are on average ~250 nm away (for mouse; Hagiwara et al., 2018). In the dark rods are maximally depolarized to produce a steady influx of  $\text{Ca}^{2+}$  that drives the continual turnover of SVs. This keeps synaptic glutamate high enough to activate the postsynaptic inhibitory mGluR6→TRPM1 pathway in the rod ON-bipolar dendrite (Koike et al., 2010), which equates to the 'dark signal'. A weak flux of photons is sufficient to hyperpolarize the rod and momentarily slow exocytosis to create the 'light signal' (for review, Field and Sampath, 2017). Mathematical models have predicted that a rod ribbon needs to achieve a release rate  $\geq 40 \text{ SVs-s}^{-1}$  in the dark to keep the rod ON-bipolar pathway continually activated (Rao-Mirotznik et al., 1998; Hasegawa et al., 2006).

In the current study high resolution measurements of evoked SV turnover were made directly from mouse rods. The results demonstrate that the rod ribbon creates multiple, uniformly primed SV release sites. Surprisingly, the  $\text{Ca}_v1.4$  channels activated rapidly (~200  $\mu\text{s}$ ) and exhibited unique forms of facilitation that influenced ultrafast release rates. In addition, the channels supported continual  $\text{Ca}^{2+}$  entry which drove the steady turnover of 288  $\text{SVs-s}^{-1}$ . These features were dependent on the ribbon, as ribbonless rods formed a much smaller RRP, and lacked  $\text{Ca}_v$  channel facilitation. The study provides experimental results that support longstanding proposals on the function of the rod ribbon synapse, and for the surprisingly rapid release kinetics, we discuss how this can contribute to rod dependent vision.

## Results

### Super-resolution readout of SV turnover at an individual rod ribbon

The majority of rod somata reside in the outer nuclear layer (ONL) and send a spindly axon to their singular presynaptic terminal, which contains an individual synaptic ribbon in the OPL. The minority of rod somata that are not positioned in the ONL, but within the OPL, lack an axon and contain the synaptic ribbon within the soma compartment (see illustration in Figure 1A). In the current study, the axonless rods were targeted to optimize voltage control of the ribbon, and more rapidly activate  $Ca_v$  channels (Hagiwara et al., 2018). A profile of evoked  $Ca^{2+}$ -current ( $I_{Ca}$ ) measured from a rod filled with an intracellular concentration of 10 mM EGTA is presented to highlight the resolution the signals (Fig. 1C). To measure the fusion of SVs in response to stimulated  $Ca^{2+}$ -entry, the addition of SV membrane to whole-cell membrane capacitance ( $C_m$ ) was monitored with the sine wave based, lock-in amplifier method (Lindau and Neher, 1988). The example in Figure 1D illustrates a rod's response to a 9 msec depolarization ( $I_{Ca}$  presented in Fig. 1C), which shows an  $\sim 4$  fF  $C_m$  jump ( $\Delta C_m$ ) that was 13-fold above the standard deviation in baseline  $C_m$  ( $\sim 300$  aF). The other lock-in amplifier outputs: membrane conductance ( $G_m$ ) and series conductance ( $G_s$ ) were not affected. The  $\Delta C_m$  was equated to the number of fusing SVs with a conversion factor of 35.4 attoFarads (aF =  $10^{-18}$ F) for a 32.5 nm diameter SV (see Methods); thus, a  $\Delta C_m$  of  $\sim 4$  fF is equivalent to  $\sim 110$  SVs. Inspection of the lock-in signals, on an absolute scale, to a series of stimulation epochs further emphasizes the specificity of the  $\Delta C_m$  that followed each stimulation (Fig. 1E). The quantification of  $\Delta C_m$  over baseline and stimulation segments is illustrated in Figure 1H, and the results are plotted over the time course of the experiment (Fig. 1I). The summary of evoked  $\Delta C_m$  plotted as a function of stimulation duration reveals how rapid the rod fused  $> 100$  SVs (Fig. 1J).

Stimulated exocytosis was followed by endocytosis of membrane, apparent as a decline in  $C_m$  over the extended time course (Fig. 1E). The evoked jumps in  $C_m$  were stationary for  $\sim 0.5$  sec under the conditions used in this study (Fig. 1D-G), and then  $C_m$  decayed towards baseline in different ways: linearly, exponentially, and/or as abrupt downward steps (Fig. 1E). Rarely were large ( $> 2$ fF) downward steps in  $C_m$  observed, such as the one between the 3 and 9 msec simulations in Figure 1E (downward arrow). Given the diversity of endocytotic responses, these events were not quantified further in the current study.

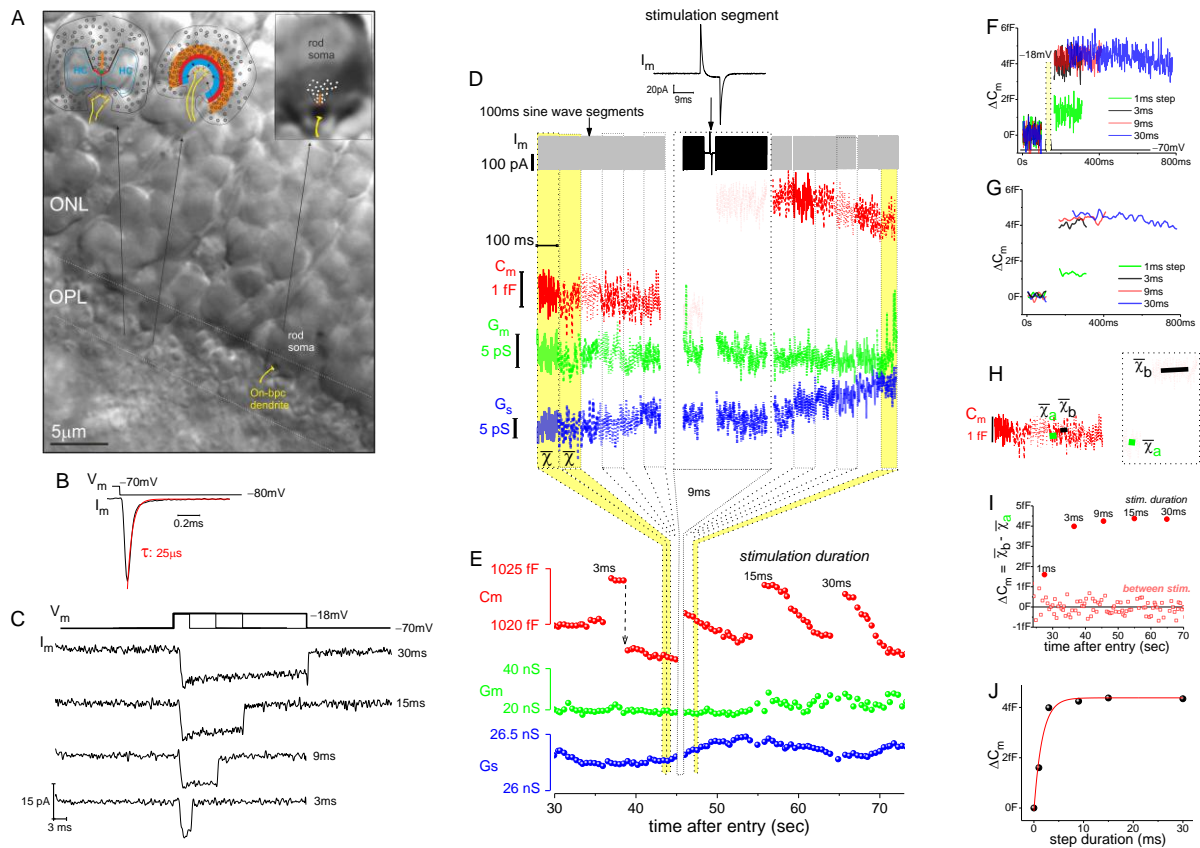

**Figure 1.** Exemplar recording from a mouse rod photoreceptor. **(A)** Image of a retinal slice centered on photoreceptor terminals in the outer plexiform layer (OPL) and somata in the outer nuclear layer (ONL). The two insets on the left and middle show rod terminals rotated  $90^\circ$  from one another, relative to the plane of the ribbon. The third inset shows a zoomed in view of an axonless rod with the ribbon and On-bpc dendrite added for reference. Legend: ribbon (orange); active zone (thick red line); arciform density (green diamond); ribbon flanked by synaptic ridges (thick black lines); horizontal cells (HC, in blue); and, ON-bipolar dendrite (yellow) with mGluR6 receptors (red). **(B)** The membrane current ( $I_m$ ) transient measured from a soma-ribbon in response to a brief hyperpolarizing voltage step. Current trace taken prior to compensating whole-cell membrane capacitance ( $C_m$ ). **(C)** Series of  $Ca^{2+}$  currents measured from an individual rod in response to voltage steps for the indicated durations. **(D)** Illustrates the behavior of the  $I_m$  and the lock-in amplifier outputs ( $C_m$ ,  $G_m$  and  $G_s$ ) in relation to a step depolarization. The  $I_m$  presented at the top of the panel shows the stimulation segment: a 9 msec step to  $-18$  mV. The  $I_m$ , before and after the stimulation, was dominated by the sine wave voltage that was used to generate the lock-in outputs (membrane capacitance ( $C_m$ ), membrane conductance ( $G_m$ ) and series conductance ( $G_s$ )). The corresponding  $I_{Ca}$  traces for this cell are presented in C. **(E)** The 100 msec sine wave segments depicted in D were binned to a mean value, and then plotted chronologically. Each stimulation produced an abrupt elevation in  $C_m$  (step durations indicated in figure). **(F)** Overlay of stimulated  $\Delta C_m$  traces from E, with the baselines zeroed and traces aligned to the onset of stimulation. **(G)** Same traces as in F, but here the signals were smoothed to a corner frequency of 20 Hz to better appreciate the differences in responses (in F the  $f_c$  was 200 Hz). **(H)** Illustrates how  $\Delta C_m$  was quantified over the baseline and stimulation segments. **(I)** Plots  $\Delta C_m$  for baseline and stimulation segments, over the course of the experiment. **(J)** Summary of evoked  $\Delta C_m$  versus step duration for this cell; step durations: 0.5, 1, 3, 9, 15 and 30 msec.

## **Ca<sub>v</sub> channel activation was rapid and exhibited moderate inactivation**

A feature that sets Ca<sub>v</sub>1.4 channels apart from other L-type channels is that their expression is limited to photoreceptor terminals (for review, McRory et al., 2004; Pangrsic et al., 2018). By comparison, other L-type channels, such as Ca<sub>v</sub>1.2 and 1.3, are expressed throughout the nervous system, and additionally in cardiac, endocrine and neuroendocrine cells, and such prevalence has led to significantly more insight into their biophysical properties (Dolphin and Lee, 2020). Therefore, some of the basic biophysical properties of mouse rod Ca<sub>v</sub>1.4 channels, which have not previously been described, are reported next.

The voltage-dependence of Ca<sup>2+</sup>-current activation was examined over a range of voltage steps, and the rods were filled with 10 mM EGTA to minimize Ca<sup>2+</sup>-activated Cl<sup>-</sup> currents (Bader et al., 1982). The depolarization stimulated I<sub>Ca</sub> showed a steep dependence on voltage (Fig. 2A), and this was quantified by measuring peak-I<sub>Ca</sub> amplitude (Fig. 2B) and calcium tail-current (I<sub>Ca</sub>-tail) amplitude (Fig. 2C). Specifically, a depolarizing step (V<sub>step</sub>) to -40 mV produced a peak-I<sub>Ca</sub>:  $-0.89 \pm 0.34$  pA, and by -10 mV the maximal peak-I<sub>Ca</sub> was reached, and averaged  $-14.15 \pm 0.75$  pA (9 cells; Fig. 2D) (liquid junction potential = 8.9 mV, and it is not subtracted from V<sub>step</sub>; see Methods). Fitting the peak-I<sub>Ca</sub> versus V<sub>step</sub> curve with a Boltzmann equation gave a half-maximal peak-I<sub>Ca</sub> at a voltage of  $-28.7 \pm 0.4$  mV (see Table S3). Next, to better estimate the point when half of the available Ca<sub>v</sub> channels opened (V<sub>1/2</sub>), a modified Boltzmann I-V equation was used, one that accounted for V<sub>rev</sub> and G<sub>max</sub> (see Methods). This approach gave a V<sub>1/2</sub> =  $-23.4 \pm 1.0$  mV (fit presented in Fig. 2D, and Table S3). Lastly, I<sub>Ca</sub>-tail amplitudes were measured to determine the fraction of channels that opened at each V<sub>step</sub>, and this gave a half-maximal amplitude at approximately -30 mV (dashed line in Fig. 2E). However, fitting the curve with a sigmoidal equation to estimate V<sub>1/2</sub> was not possible, because the I<sub>Ca</sub>-tail amplitudes appeared to decrease at V<sub>step</sub> values positive to -10 mV (Fig. 2E). This behavior may indicate a degree of Ca<sub>v</sub> channel inactivation within the 10 msec voltage step (see below). Therefore, the best estimate for half-maximal channel activation was derived from the modified Boltzmann I-V equation (Fig. 2D).

Studies of Ca<sub>v</sub>1.4 channels in heterologous expression systems have reported they inactivate slowly (Pangrsic et al., 2018), and I<sub>Ca</sub> measured from salamander rods do not exhibit inactivation (Bader et al., 1982). To assess the situation in mouse rods, prolonged steps were examined for signs of I<sub>Ca</sub> inactivation. Steps from -70 mV to -18 mV, for varying durations, declined in amplitude within the first 30 msec, and after this the steady I<sub>Ca</sub> was maintained (Fig. 2F). For instance, the 200 depolarizations had an initial peak-I<sub>Ca</sub> =  $-13.2 \pm 0.8$  pA, and

ended with a mean current  $I_{Ca} = -9.2 \pm 1.2$  pA (7 cells). This 31 % decay in  $I_{Ca}$  had a  $\tau = 19.46 \pm 0.01$  msec (7 cells; Fig. 2F). For several reasons, this behavior arguably represents inactivation of  $Ca_v$  channels, or relaxation of facilitation, rather than contamination by other ionic currents. First, the overlay of depolarizations for the different durations shows that the membrane current approached baseline within 1 msec after repolarizing the rod (Fig. 2G), which is in accord with  $Ca_v$  channel deactivation (Fig. 2C). Second, the intra- and extra-cellular solutions were designed to mitigate contamination from other membrane currents (see Methods). Third, recording directly from the terminal provides optimal electrical control of the  $Ca_v$  channels and faster infusion (see Hagiwara et al., 2018). For these reasons, it is concluded that a fraction of the  $Ca_v$  channels are sensitive to inactivation, or all are partially inactivating, which to our knowledge has not been described before in photoreceptors.



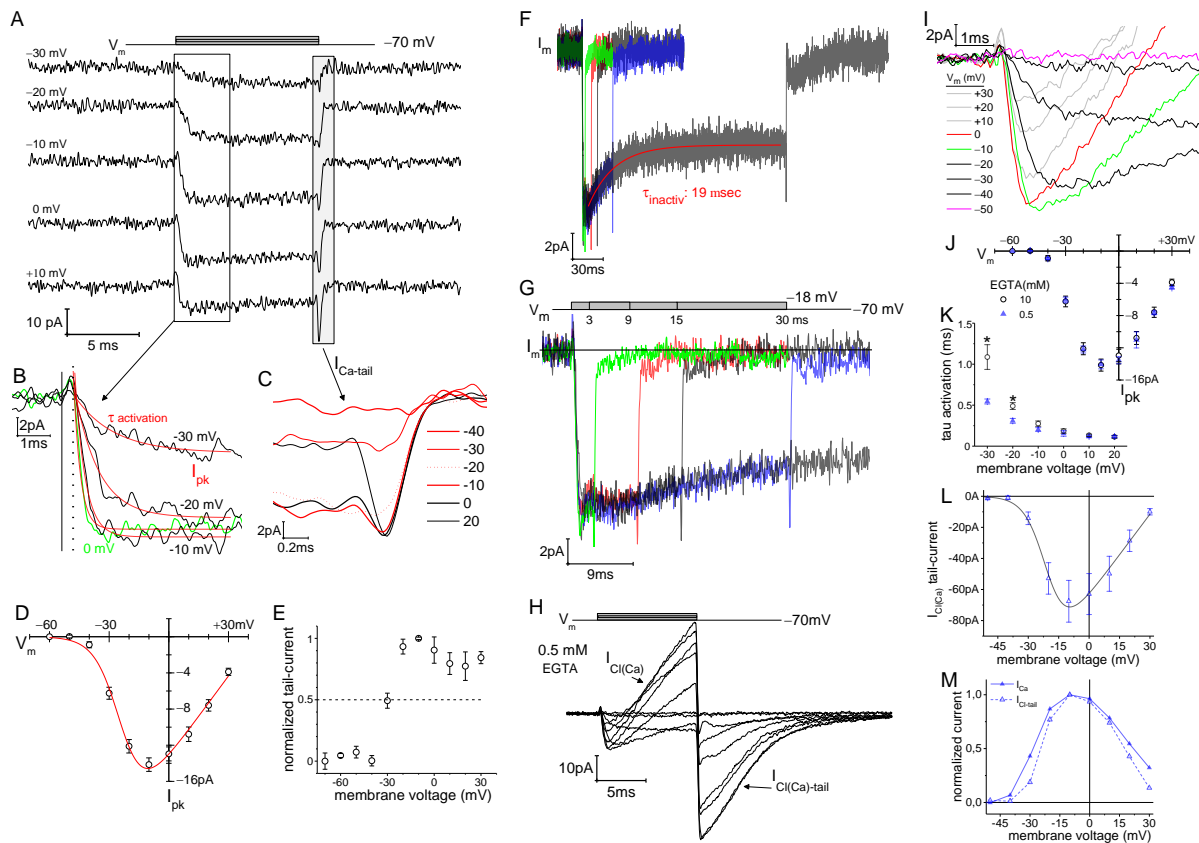

**Figure 2.** Voltage-dependence of  $\text{Ca}^{2+}$ -currents and  $\text{Ca}^{2+}$ -activated currents. (A) A family of individual  $I_{\text{Ca}}$  traces measured in response to 10 msec voltage steps, delivered at 10 mV increments, over a range of  $-80$  to  $+30$  mV (10 mM EGTA in the pipette). (B) Zoomed in view of  $I_{\text{Ca}}$  activation. Start of the  $V_{\text{step}}$  is indicated with the vertical solid line, and onset of  $I_{\text{Ca}}$  is indicated with vertical dashed line (dead time of  $\sim 300$   $\mu\text{sec}$ ). An exponential function was used to fit (red lines) each  $I_{\text{Ca}}$  trace from which  $\tau_{\text{activation}}$  and peak- $I_{\text{Ca}}$  amplitude were ascertained. (C) Overlay of tail currents from A. (D) Averaged peak- $I_{\text{Ca}}$  versus  $V_{\text{step}}$  fit with a modified Boltzmann I-V equation ( $V_{1/2}$ :  $-24.0 \pm 1.3$ , slope (dx):  $-6.2 \pm 0.6$  mV/e,  $V_{\text{rev}}$ :  $+44.6 \pm 2.6$  mV, and  $G_{\text{max}}$ :  $0.30 \pm 0.02$  pA-mV $^{-1}$ ; 9 cells; see Tables S2 and S3). (E) Normalized  $I_{\text{Ca-tail}}$  plotted over  $V_{\text{step}}$  (4 cells). (F) Overlay of average membrane currents in response to voltage steps from  $-70$  to  $-18$  mV for the indicated durations (averages from 7 to 13 cells). The  $I_{\text{Ca}}$  associated with the 200 msec step depolarizations (7 cells) were fit as a single exponential decay ( $\tau = \tau_{\text{inactivation}}$ ). (G) Zoomed in view of the shorter duration voltage steps highlights the rapid return of  $I_{\text{Ca}}$  to baseline (subsequent to the transient  $I_{\text{Ca-tail}}$ ). (H) A  $\text{Ca}^{2+}$ -activated current emerged when the intracellular concentration of EGTA was lowered to 0.5 mM (8 cells). The outward  $I_{\text{Cl(Ca)}}$  that occurred during the step and the subsequent inward  $I_{\text{Cl(Ca)-tail}}$  are designated in plot. (I) Expanded view of the activation portion of the current traces from C. The voltage protocol used here was the same as that in A, and the vertical line marks the start of  $V_{\text{step}}$ , and the dashed vertical line indicates current onset. (J) Overlay of average peak- $I_{\text{Ca}}$  plotted over  $V_{\text{step}}$ , derived from experiments with 0.5 (8 cells) and 10 mM EGTA (also presented in Aii), are highly overlapping. (K)  $\tau_{\text{activation}}$  versus  $V_{\text{step}}$  for low and high EGTA conditions (\*:  $p \leq 0.006$ ; see Table S2). (L) Average  $I_{\text{Cl(Ca)-tail}}$  versus  $V_{\text{step}}$  (6 cells). Boltzmann I-V fit (blue trace):  $V_{1/2}$ :  $-20.4 \pm 0.5$ , slope (dx):  $-5.6 \pm 1$  mV/e,  $V_{\text{rev}}$ :  $+35.8 \pm 3.8$  mV and  $G_{\text{max}}$ :  $1.41 \pm 0.44$  pA-mV $^{-1}$  (6 cells; see Table S4). (M) Normalized average  $I_{\text{Cl(Ca)}}$  and peak- $I_{\text{Ca}}$  (from 0.5 EGTA data) plotted over  $V_{\text{step}}$  (error bars excluded).

## Expanding the $\text{Ca}^{2+}$ -domain triggers $\text{Ca}^{2+}$ -activated channels

By decreasing intracellular EGTA from 10 to 0.5 mM, the  $\text{Ca}^{2+}$ -domain that forms about the  $\text{Ca}_v$  channel during depolarization is predicted to expand in size from 6 to 210 nm around the  $\text{Ca}_v$  channels, respectively (Neher, 1986). At ribbon synapses, 10 mM EGTA is reported to restrict the domain of elevated free  $\text{Ca}^{2+}$  to the base of the ribbon where the  $\text{Ca}_v$  channels reside (Moser et al., 2019), and the domain should spread up the synaptic ridges when 0.5 mM EGTA is used. When intracellular EGTA was lowered, an outward-current appeared during depolarization (presumed  $\text{Cl}^-$  influx), and an inward tail-current ( $\text{Cl}^-$  efflux) ensued upon repolarization to  $-70$  mV (Fig. 2H). The tail-currents decayed much slower (Fig. 2H) than  $I_{\text{Ca}}$ -tails (Fig. 2A-B). Since rods express the  $\text{Ca}^{2+}$ -activated  $\text{Cl}^-$  channel TMEM-16A at their terminals (Mercer et al., 2011), and the  $\text{Cl}^-$  reversal potential is estimated to be  $-41$  mV (see Methods), the  $\text{Ca}^{2+}$ -activated current is presumed to be carried by  $\text{Cl}^-$ , and referred to here as  $I_{\text{Cl}(\text{Ca})}$  (Bader et al., 1982; Mercer et al., 2011). The magnitude of peak- $I_{\text{Ca}}$  measured prior to the onset of the outward  $\text{Cl}^-$ -current (measurements described in Fig. 2B; and see Methods) was virtually identical for the two EGTA buffering conditions at each  $V_{\text{step}}$  (Fig. 2J; see Table S2 and S3). In contrast, activation kinetics were influenced by changing intracellular EGTA. This was most pronounced with an intracellular concentration of 10 mM EGTA, where the tau for activation ( $\tau_{\text{activ}}$ ) changed 6-fold when  $V_{\text{step}}$  was incrementally increased from  $-30$  to  $0$  mV ( $1.09 \pm 0.15$  and  $0.18 \pm 0.03$  msec, respectively; 9 cells; Fig. 2K). By comparison, with 0.5 mM EGTA the  $\tau_{\text{activ}}$  changed 3.4-fold from  $-30$  and  $0$  mV ( $\tau_{\text{activ}}$  of  $0.55 \pm 0.03$  and  $0.16 \pm 0.03$  msec, respectively; 8 cells; Fig. 2K). The  $\tau_{\text{activ}}$  values measured at  $0$  mV were similar with low and high EGTA, but at  $-30$  mV the higher EGTA concentration gave a  $\tau_{\text{activ}}$  that was 2-fold slower than that measured with low EGTA ( $p$ : 0.003; see Table S2 for further kinetic descriptions). These results are interpreted as  $\text{Ca}^{2+}$ -dependent facilitation of  $\text{Ca}_v$  channel activation kinetics, but not peak- $I_{\text{Ca}}$  amplitude, which is similar to the behavior of inner hair cell  $\text{Ca}_v1.3$  channels (Goutman and Glowatzki, 2011). Such alterations in  $I_{\text{Ca}}$  activation kinetics have not been reported for PRs (for review, Pangrsic et al., 2018).

Finally, the plot of  $I_{\text{Cl}(\text{Ca})}$ -tail amplitudes versus voltage (Fig. 2L; see Table S4 for Boltzmann fits) is reminiscent of the  $I_{\text{Ca}}-V_{\text{step}}$  curves (Fig. 2J). To more directly assess if the number of  $\text{Cl}^-$ -channels activated in proportion to the number of  $\text{Ca}_v$  channels open, the

normalized currents were plotted in parallel against  $V_{\text{step}}$  (Fig. 2M). This plot shows the  $I_{\text{Cl(Ca)}}$ -tails were fully nested within peak- $I_{\text{Ca}}$ , which argues that the  $\text{Ca}_v$  channels serve as the primary source of  $\text{Ca}^{2+}$  for activating the  $\text{Cl}^-$ -channels when 0.5 mM EGTA and short depolarizing steps were used. In summary, comparison of results with intracellular concentrations of 0.5 and 10 mM EGTA suggests that the  $\text{Ca}^{2+}$ -activated channels are not co-localized at the base of the ribbon with the  $\text{Ca}_v$  channels, because 10 mM EGTA fully blocked activation of the  $\text{Cl}^-$ -channels; but instead, they reside further up the synaptic ridges.

### **The readily releasable pool of SVs is primed for ultrafast release**

As the example in Figure 1 outlined, evoked  $\Delta C_m$  reflect the number of SVs fusing. With 10 mM EGTA, the average evoked  $\Delta C_m$  plotted against step duration showed the greatest rate of change occurred with the shortest step durations (Fig. 3A). A single exponential fit to steps from 0.5 to 9 msec was made with a  $\tau_{\text{depletion}} = 348 \mu\text{sec}$  and an amplitude of 3.27 fF (adjusted R-square = 0.999), and extending the fit out to 30 msec gave a comparable result with a  $\tau_{\text{depletion}} = 383 \mu\text{sec}$  and an amplitude of 3.43 fF (adjusted R-square = 0.992; 7 to 15 cells per step duration; Fig. 3A). Taking the fit to the shorter time range yields an RRP of 92 SVs. Notably, the 0.5 msec steps produced negligible changes in  $C_m$  ( $0.14 \pm 0.19 \text{ fF} \sim 4 \text{ SVs}$ ; 8 cells), while 1 msec steps released  $\sim 70\%$  of the RRP ( $\Delta C_m$ :  $2.11 \pm 0.74 \text{ fF} \sim 60 \text{ SVs}$ ; 14 cells).

The change in  $\Delta C_m$  from 3 to 30 msec was a modest 14 % increase in release ( $2.99 \pm 0.48$  vs.  $3.54 \pm 0.50 \text{ fF}$ ;  $p$ : 0.033, paired sample t-Test; 7 cells). To derive a steady release rate, 200 msec depolarizations were made later in the recordings, outside the series of short duration steps. After accounting for potential rundown in release (see Fig. S1A-F), the 200 msec depolarizations are estimated to yield  $5.31 \pm 1.25 \text{ fF}$  (Fig. S1D; 7 cells). Subtracting this value from the initial exponential release phase (the RRP) gives a  $\Delta C_m$  of 2.04 fF (=  $5.31 \text{ fF} - 3.27 \text{ fF}$ ) within 200 msec, which equates to a continual release rate of  $10.2 \text{ fF}\cdot\text{s}^{-1}$ . In total, the results provide clear evidence for an ultrafast pool of 92 SVs with a  $\tau_{\text{depletion}} < 0.4$  msec, and subsequent release under steady  $\text{Ca}^{2+}$  entry proceeded at a rate of  $288 \text{ SVs}\cdot\text{s}^{-1}$ .

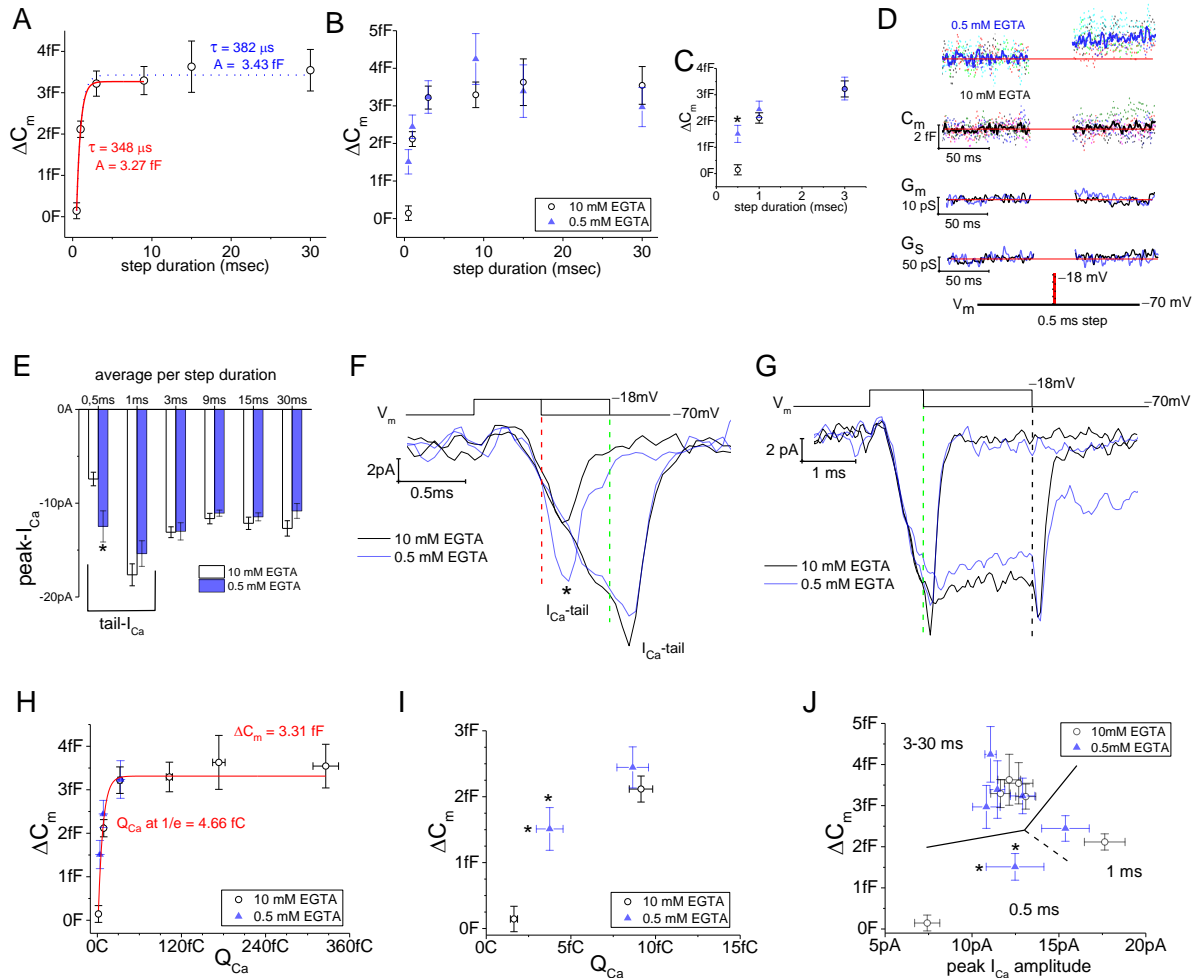

**Figure 3.** Release facilitation and ultrafast depletion of the rod's RRP of SVs. **(A)** Average  $\Delta C_m$  measured from rods filled with 10 mM EGTA, and stimulated with a  $V_{\text{step}}$  to  $-18$  mV for durations: 0.5 to 30 msec. Single exponential fits to points from 0.5 - 9 msec (red curve), and from 0.5 - 30 msec (dotted curve). **(B)** Comparison of  $\Delta C_m$  derived from experiments with 0.5 or 10 mM EGTA in the pipette; voltage step durations: 0.5 to 30 msec. **(C)** Highlights the more rapid  $\Delta C_m$  at the singular time point of 0.5 msec when rods were loaded with 0.5 mM EGTA (\*,  $p$ : 0.0016; 6 and 8 cells for 0.5 and 10 mM EGTA). **(D)** Summary of lock-in amplifier traces recorded during 0.5 msec step depolarizations, with either 0.5 or 10 mM EGTA. The  $C_m$  traces represent an overlay of individual recordings (dashed traces: each cell a separate color). The averaged  $C_m$ ,  $G_m$  and  $G_s$  responses are indicated by the trace font; with blue: 0.5 mM EGTA (6 cells) and black: 10 mM EGTA (8 cells). Only average responses are presented for  $G_m$  and  $G_s$ . **(E)** Comparison of average peak- $I_{Ca}$  derived from high and low intracellular EGTA. Only voltage steps for 0.5 msec were statistically different when comparing different EGTA levels ( $p$ : 0.008; see text). The 0.5 and 1 msec steps were dominated by the tail-currents, which is why their amplitudes varied from steps  $\geq 3$  msec. **(F and G)** Overlay of average current traces in response to step durations of 0.5, 1 and 3 msec (\*, sign. diff.; see D). Most notable are the overlapping inward  $I_{Ca}$  traces that began after  $V_{\text{step}}$  onset, and second the moment of repolarization (vertical dashed lines) that elicited tail-currents. **(H)** Plot of  $\Delta C_m$  over  $Q_{Ca}$ . All data points from experiments with 0.5 and 10 mM EGTA were treated as one group and fit with a single exponential equation (red curve) to estimate the size of the RRP ( $\Delta C_m$  amplitude) and the amount of  $Q_{Ca}$  to release 63% ( $\sim 1/e$ ) of the RRP. Only steps for 0.5, 1 and 3 msec were used from the 0.5 mM EGTA dataset since an outward  $I_{Cl(Ca)}$  interfered with estimation of  $Q_{Ca}$  when step duration exceeded 3 msec. **(I)** Zoomed in view of  $\Delta C_m$  and  $Q_{Ca}$  produced with 0.5 and 1 msec steps. \* indicates a significant difference for  $Q_{Ca}$  between 0.5 mM vs. 10 mM EGTA;  $p$ : 0.04, and 6 and 9 cells, respectively. For statistical comparison of  $\Delta C_m$  values see C and text. **(J)** Plot of  $\Delta C_m$  over peak- $I_{Ca}$  for step durations: 0.5 to 30 msec (dashed lines partition data points by step duration).

## Lowering the intracellular $\text{Ca}^{2+}$ -buffer expedited release onset

When rods, filled with 0.5 mM EGTA, were depolarized for 0.5 msec to  $-18$  mV, the  $\Delta C_m$  was over 10-fold larger than the responses measured with 10 mM EGTA ( $1.51 \pm 0.36$  vs.  $0.14 \pm 0.19$  fF;  $p$ : 0.006;  $n$ : 6 and 8 cells; Fig. 3B and C). This is also illustrated with a comparison of the individual and average  $C_m$ ,  $G_m$ , and  $G_s$  traces from the recordings with low and high EGTA (Fig. 3D). In contrast to the initial distinction in  $\Delta C_m$ , over the range of 1 to 30 msec steps there was a high degree of overlap between the two datasets (Fig. 3B), indicating the RPP of SVs was not altered by changing the concentration of intracellular EGTA. To understand what expedited the onset of vesicle fusion, the kinetics of channel activation were considered for the two  $\text{Ca}^{2+}$ -buffering conditions.

Since a delay of  $\sim 300$   $\mu\text{sec}$  existed between the start of depolarization and  $I_{\text{Ca}}$  onset (Fig. 2B and 2I), there was only  $\sim 200$   $\mu\text{sec}$  for  $I_{\text{Ca}}$  to develop before the 0.5 msec step ended and the  $V_m$  repolarized; hence, the 0.5 msec steps created what were essentially tail-currents. Given that  $\tau_{\text{activ}}$  at  $-20$  mV for low and high EGTA were 310 versus 489  $\mu\text{sec}$ , respectively (Table S2; Fig. 2K), it is expected that more channels opened with less  $\text{Ca}^{2+}$ -buffering. The results show that the average  $I_{\text{Ca}}$ -tail resulting from 0.5 msec steps to  $-18$  mV were approximately two-fold larger when less EGTA was used ( $-7.4 \pm 0.7$  versus  $-12.5 \pm 1.7$  pA;  $p$ : 0.008 from 9 and 6 cells; Fig. 3E and F). In contrast, the 1 msec steps formed comparable  $I_{\text{Ca}}$ -tail under the two intracellular EGTA conditions (Fig. 3E-G), because the step duration was  $> \tau_{\text{activ}}$ . Finally, the current responses to longer depolarizations ( $\geq 3$  msec) were separable from the tail-currents and quantified by measuring the initial peak- $I_{\text{Ca}}$  (as illustrated in Fig. 2B). These longer steps gave similar peak- $I_{\text{Ca}}$  that ranged from  $-11$  to  $-13$  pA in both low and high  $\text{Ca}^{2+}$ -buffering (Fig. 3E). This result agrees with the data derived from the 10 msec steps that were used to construct I-V curves (Fig. 2J), specifically: peak- $I_{\text{Ca}}$  was the same under conditions of low and high EGTA even though activation times were different.

Evaluating  $\Delta C_m$  as a function of the  $\text{Ca}^{2+}$  influx, rather than time, again emphasizes the finite size of the RRP. Since  $Q_{\text{Ca}}$  is the integral of a  $I_{\text{Ca}}$  that inactivated moderately over time (Fig. 2F), the relationship between  $\Delta C_m$  and  $Q_{\text{Ca}}$  resembled that observed for  $\Delta C_m$  versus step duration (Fig. 3H). The combined  $\Delta C_m$  and  $Q_{\text{Ca}}$  data from low and high EGTA experiments (11 and 15 cells, respectively) formed a continual exponential curve with a  $\Delta C_m$  amplitude = 3.31 fF (RRP  $\sim 94$  SVs; Fig. 3H). A  $Q_{\text{Ca}}$  at  $1/e$  reached 4.66 fC, which equates to

12,263  $\text{Ca}^{2+}$  ions (1  $\text{Ca}^{2+}$  ion =  $3.8 \times 10^{-19}\text{C}$ ) that are needed to empty 63 % of the RRP of SVs (Fig. 3H). The second comparison made here is  $\Delta C_m$  versus  $I_{\text{Ca}}$  amplitude. Plotted in Figure 3J is a combination of  $I_{\text{Ca}}$ -tail (from 0.5 and 1 msec steps) and peak- $I_{\text{Ca}}$  measured at the onset of depolarization (steps  $\geq 3$  msec). The first observation is that steps  $\geq 3$  msec in duration produced a group of  $\Delta C_m$  values between 3 to 4 fF, i.e. depleted the RRP, at a peak- $I_{\text{Ca}}$  of approximately  $-12$  pA (Fig. 3J). In contrast, the four  $I_{\text{Ca}}$ -tails stimulated with 0.5 and 1 msec steps produced a range of  $\Delta C_m$  (0.2 to 2 fF) and  $I_{\text{Ca}}$  amplitudes ( $-7.5$  to  $-18$  pA) that approximated a linear relationship (Fig. 3J). In summary, a smooth exponential depletion of the RRP is apparent when  $\Delta C_m$  is analyzed as a function of  $Q_{\text{Ca}}$  or the duration of depolarization.

Electron microscopy (EM) studies of mouse and cat rod ribbons have described some 60 to 120 SVs docked at the base of the ribbon (Rao-Mirotnik et al., 1995; Zampighi et al., 2011; Cooper et al., 2012; Grabner et al., 2015), which correlates well with the physiological findings presented here. An additional 300 SVs were reported near the plasma membrane, along the synaptic ridges, which run vertically from the base of the ribbon (Zampighi et al., 2011; for review, Moser et al., 2019). These SVs are not ribbon-tethered, nor are they necessarily tightly associated with the plasma membrane, i.e. docked. The evoked exocytosis responses presented here can be interpreted as release originating from the base of the ribbon since 1) the RRP is close to the number of SVs estimated to be at the base of the ribbon, and 2) expanding the domain from  $< 10$  nm (10 mM EGTA) to  $\sim 200$  nm (0.5 mM EGTA) did not recruit more SVs (Fig. 3B).

### **Ribbonless rods support only marginal evoked exocytosis**

An earlier electron microscopy study that introduced RIBEYE-ko mice, which lack synaptic ribbons in PRs, showed that ribbonless rods had only 40 % of wild type (wt) SVs at their active zones (Maxeiner et al., 2016). The study did not measure release from rods; therefore, we tested whether the loss of SVs would show up as a correlated reduction in the size of the RRP. The average  $\Delta C_m$  following 1 and 3 msec steps delivered to ribbonless rods filled with 10 mM EGTA amounted to  $0.21 \pm 0.20$  and  $0.68 \pm 0.34$  fF, respectively (Fig. 4B; 7 and 8 cells), which were 10- and 5-fold smaller than wt  $\Delta C_m$  evoked with 1 and 3 msec steps:  $2.12 \pm 0.20$  and  $3.22 \pm 0.31$  fF (Fig. 3A), respectively (p-values  $< 0.0001$  for wt vs. ko; 14 and 15 cells). Responses from ribbonless rods elicited with longer duration steps did not exceed the  $\Delta C_m$  elicited by 3 msec steps (Fig. 4A). Fitting  $\Delta C_m$  versus step duration with a single

exponential equation gave a  $\tau_{\text{depletion}} = 560 \mu\text{sec}$  and a  $\Delta C_m$  amplitude = 0.84 fF (RRP ~ 24 SVs; Fig. 8 cells), i.e. only 24 % the size of that measured in wt rods ( $\Delta C_m$ : 3.43 fF).

To further investigate if the reduction in exocytosis measured from ribbonless rods reflected a reduction in the number of SVs available for release or impairment of coupling of  $\text{Ca}^{2+}$  influx to SVs, as concluded to occur at ribbonless retinal bipolar cells (Maxeiner et al., 2016), the concentration of intracellular EGTA was lowered. Ribbonless rods filled with 0.5 mM EGTA and given 1 and 3 msec stimulations produced  $\Delta C_m$  that averaged  $0.70 \pm 0.16$  and  $0.86 \pm 0.67$  fF, respectively (Fig. 4B; 12 cells for each group). In contrast, wt rods filled with 0.5 mM EGTA given 1 and 3 msec stimulations averaged  $\Delta C_m$  of  $2.44 \pm 0.31$  and  $3.24 \pm 0.43$  fF respectively, (Fig. 4B; 11 cells in each group); thus, ribbonless rods generated evoked  $\Delta C_m$  that were < 30 % the size of wt responses (p-values for wt vs. ko, 1 and 3 msec: 0.00016 and 0.00023). Overall, the results from the different  $\text{Ca}^{2+}$ -buffering conditions indicate that the RRP formed by ribbonless rods was only ~24 SVs, which is approximately a quarter the size of the RRP of wt rods. Interestingly, the different EGTA concentrations did not significantly influence RRP size within either genotype, nor were the kinetics of depletion altered in ko mice. Thus, these results suggest that the coupling of  $\text{Ca}^{2+}$  influx to exocytosis was not noticeably different between genotypes, but rather the number of release ready SVs appears to be the primary distinction between ribbonless and wt rods.

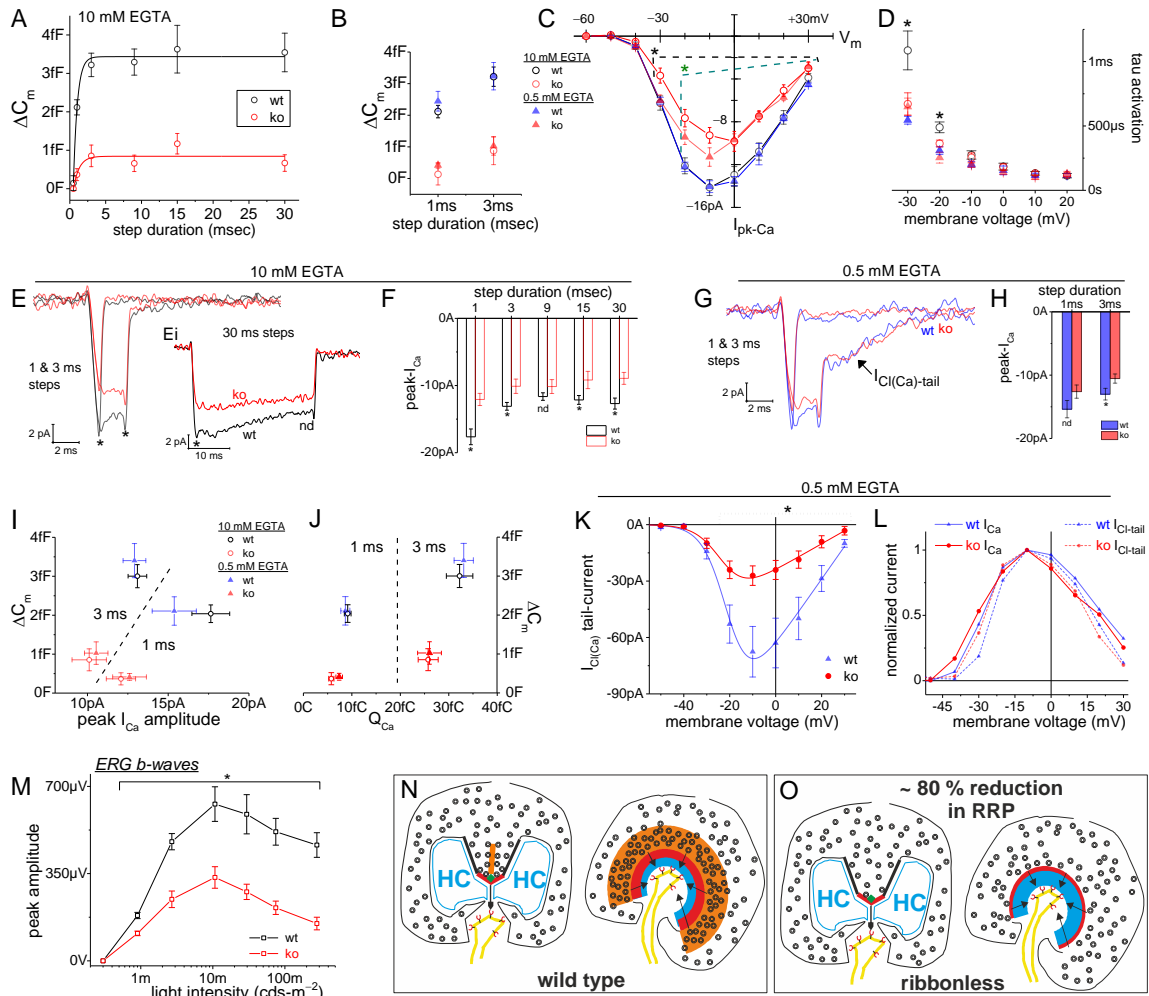

**Figure 4.** Ribbonless rods lack  $\text{Ca}_v$  channel facilitation, form a modest RRP and lack normal light responses. (A) Estimation of RRP size and depletion kinetics for RIBEYE-ko rods (10 mM EGTA in the pipette; step durations ranged from 1 to 30 msec). Wild type responses overlaid for comparison, and their evoked  $\Delta C_m$  were significantly larger than ko values at every step duration (see text for description of fits). (B) Comparison of all responses that were evoked with 1 and 3 msec steps, with either 0.5 or 10 mM EGTA in the pipette, and for wt and ko rods. All ko responses were significantly smaller than wt values, see text. (C) The peak- $I_{Ca}$  plotted over  $V_{step}$ . Ribbonless rods had significantly smaller peak- $I_{Ca}$  at the indicated  $V_{steps}$  (\*, p-values < 0.05), with comparisons made between wt vs. ko rods for 0.5 mM EGTA (green dashed line) and 10 mM EGTA (dashed grey line). See Fig. 2A for a description of voltage step protocols and analysis. (D)  $I_{Ca}$  activation kinetics were significantly slower for wt rods filled with 10 mM EGTA (\* indicates sig. diff.; see Table S2 for details). (E and F) Averaged  $I_{Ca}$  traces illustrates the differences between genotype were pronounced shortly after the onset of depolarization (peak- $I_{Ca}$ ) and at the end of short duration steps (\*, at onset and tail-currents). (Ei) Wild type rods filled with 10 mM EGTA showed a faster rate of  $I_{Ca}$  inactivation than ko rods. At the end of the 30 msec steps, the traces were not statistically different (nd,  $p > 0.3$ ). (Note: 1msec steps were tail-currents, and therefore larger in amplitude than peak- $I_{Ca}$ ). (G and H) Comparison of genotypes with 0.5 mM EGTA. Statistical comparisons showed no difference for 1 msec steps (nd,  $p: 0.13$ ; 9 and 11 cells each), while the 3 msec steps were significantly larger in wt (\*,  $p: 0.05$ ; 9 and 12 cells each). (I and J) All  $\Delta C_m$  in response to 1 and 3 msec steps plotted over peak- $I_{Ca}$ , and  $Q_{Ca}$ . (K) Average  $I_{Cl(Ca)}$ -tails versus  $V_{step}$ . For the Boltzmann I-V fits see Table S4. (L) Normalized average  $I_{Cl(Ca)}$ -tails and peak- $I_{Ca}$  plotted over  $V_{step}$  for wt and ko rods (error bars excluded). (M) Summary of dark-adapted erg b-waves measured for wt and ko mice (\*,  $p < 0.04$ ; 4 ko and 3 wt mice). (N) Cartoon of a wt rod and (O) a ribbonless rod.



## Deleting the ribbon alters $\text{Ca}_v$ channel properties

Previous work had indicated the density of  $\text{Ca}_v1.4$  staining was altered in ribbonless rods (Maxeiner et al., 2016; Dembla et al., 2020). More to the point, the ribbon-shaped profile that  $\text{Ca}_v$  channels adhere to in control rods were reduced in length by 50 % in ribbonless rod terminals; however, protein levels of the  $\alpha1F$  subunit of  $\text{Ca}_v1.4$  were similar in Western blots of wt and ko retina (Maxeiner et al., 2016). To test if these changes affect the behavior of  $\text{Ca}_v1.4$  channels, a comparison of  $\text{Ca}^{2+}$  currents from wt and ribbonless rods was made. Results derived from 10 msec voltage steps showed a significant overall reduction in the ribbonless rods peak- $I_{\text{Ca}}$  across  $V_{\text{step}}$ 's from  $-30$  to  $+30$  mV (Fig. 4C; and see Tables S2 and S3). Specifically, with 10 mM EGTA in the pipette, the peak- $I_{\text{Ca}}$  amplitude was approximately 35 % smaller in ko rods than in wt rods ( $p < 0.001$  or smaller, depending on  $V_{\text{step}}$ ; 9 wt and 5 ko cells), and when 0.5 mM EGTA was used the amplitudes were 20 % smaller than in wt controls ( $p < 0.05$  or less; 8 wt and 7 ko cells; Fig. 4C, and Table S3). Additional biophysical values were derived from Boltzmann fits to the I-V curves. This analysis shows that ko rods had a maximal conductance  $\sim 34$  % smaller than wt values, and this was true for experiments performed with high and low intracellular EGTA concentrations ( $p$ : 0.024 and 0.029, respectively; Table S3). In addition, with 10 mM EGTA in the pipette  $V_{1/2}$  for peak- $I_{\text{Ca}}$  amplitude measured from ribbonless rods was shifted  $+1.4$  mV from wt values (though the level of significance depended on the specific type of Boltzmann fit; Fig. 4C and see Table S3). In contrast, 0.5 mM EGTA tended to shift ribbonless rods  $V_{1/2}$  in the opposite direction by  $-1.7$  mV from wt values, but again the difference was not significant ( $p \sim 0.17$ ; 8 and 7 cells; Fig. 4C and see Table S3). The final comparison made from the voltage steps are current activation kinetics, which were similar under all conditions, with one exception:  $\text{Ca}_v$  channels in the wt rods filled with 10 mM EGTA were significantly slower to open (Fig. 4D).

The reduction in ribbonless rod peak- $I_{\text{Ca}}$  was also observed in recordings that depolarized rods to  $-18$  mV for different durations with 10 mM EGTA in the intracellular solution (Fig. 4E and 4F); however, over time the difference faded as  $\text{Ca}_v$  channels in wt rods inactivated more rapidly. Specifically, 30 msec steps had an initial peak- $I_{\text{Ca}}$  that was larger in wt rods ( $-13.3 \pm 0.43$  pA vs.  $-8.7 \pm 0.8$  pA,  $p$ : 0.0002; 7 per genotype), but by the end of the 30 msec step the wt and ribbonless  $I_{\text{Ca}}$  were no longer statistically different ( $-8.7 \pm 0.8$  pA vs.  $-7.4 \pm 1.1$  pA,  $p$ : 0.35; 7 cells each; Fig 4Ei). In the case of recordings with 0.5 mM EGTA

in the pipette, the 1 and 3 msec depolarizations tended to produce smaller  $I_{Ca}$  amplitudes in the ribbonless rods (Fig. 4G, and see 4H for statistical comparisons). In total,  $Ca_v$  channel behavior in ribbonless rods filled with low or high EGTA were distinguished from their wt counter parts in one or more of the following ways: they had a lower  $I_{Ca}$  density at the onset of depolarization, showed a shift in  $V_{1/2}$  and they exhibited less current inactivation (or less facilitation at onset). The influence of peak- $I_{Ca}$  and  $Q_{Ca}$  on evoked  $\Delta C_m$  are summarized for 1 and 3 msec steps, with low and high intracellular EGTA, and for both genotypes (Fig. 4I and J). In the end, the ribbon was the most significant determinant of the magnitude of the evoked  $\Delta C_m$ .

### **Alterations in ribbonless rods $Ca^{2+}$ -activated currents**

The  $I_{Cl(Ca)}$ -tails currents obtained in 0.5 mM EGTA from wt rods (Fig. 2C), followed the behavior of  $Ca_v$  channel activation (Fig. 2L and M), and same can be said for  $I_{Cl(Ca)}$ -tail currents measured from ko rods (Fig. 4K). However, ribbonless rods produced significantly smaller  $I_{Cl(Ca)}$ -tails amplitudes, which were only 40 % the size of wt currents (Fig. 4K; Table S4). To further evaluate the voltage-dependence of current activation, Boltzmann fits were made to the  $I_{Cl(Ca)}$ -tails versus  $V_{step}$  curves. On average, the maximal conductances measured from ribbonless rods were 50 % smaller than currents recorded from wt rods ( $G_{max}$ :  $0.70 \pm 0.13$  versus  $1.41 \pm 0.44$  pA-mV<sup>-1</sup>), though the difference was not statistically significant (p: 0.17; see Table S4). This parallels the observation that the peak- $I_{Ca}$  amplitude was significantly larger in wt than ko rods (32 % larger; Table S3). Next, the voltage for half-maximal  $I_{Cl(Ca)}$  was reached at more negative membrane voltages than wt rods ( $V_{1/2}$  for  $I_{Cl(Ca)}$ , wt vs. ko:  $-20.4 \pm 0.5$  vs.  $-22.8 \pm 0.6$  mV, respectively; p: 0.016. Table S4). This correlates with the tendency for peak- $I_{Ca}$  amplitude measured from ribbonless rods to have a negatively shifted  $V_{1/2}$  when 0.5 mM EGTA was in the pipette (peak- $I_{Ca}$   $V_{1/2}$  values, wt vs. ko:  $-23.2 \pm 0.9$  vs.  $-25.3 \pm 1.1$  mV, respectively; p: 0.17, Table S3). Overall, the  $Ca^{2+}$ -activated currents were fully nested within the peak- $I_{Ca}$ , indicating their dependence on  $Ca^{2+}$ , and there was a tendency for ribbonless rods  $I_{Ca}$ -V and  $I_{Cl(Ca)}$ -V curves to shift to more hyperpolarized voltages relative to wt curves. This is illustrated in plots of normalized current amplitude versus membrane voltage for the ribbonless and wt rods (Fig. 4L).

### **Light responses in ribbonless mice are greatly reduced**

The results so far show a stark reduction in the RRP of SVs. In the intact animal, this deficit is expected to preferentially impact rod signaling in the dark, a period when the rate of

glutamate release is the highest. Normally, presenting a dim light flash to a dark-adapted retina will cause a momentary pause in glutamate release from rods, which in turn causes a depolarization (dis-inhibition) of postsynaptic rod bipolar cells. The magnitude of the light response, as assessed with electroretinogram (ERG) recordings, will reflect the number of rod to rod-bipolar synapses that detect a transient drop in glutamate. If RIBEYE-ko animals are unable to keep glutamate levels high enough to inhibit normal numbers of rod bipolar cells in the dark, then their light responses should be smaller than their wt counterpart. To test this hypothesis, ERGs were performed on dark adapted mice, under scotopic test conditions. The a-wave component of an ERG represents phototransduction in the outer segments, which hyperpolarizes the rods. Wild type and RIBEYE-ko mice had nearly identical a-wave amplitudes across the range of flash intensities (Fig. S2C), which suggests phototransduction in ribbonless rods was not altered. In contrast, the b-wave, which originates from depolarizing rod bipolar cells, measured from RIBEYE-ko animals were much smaller, reaching only 52 to 38 % of the peak amplitude of wt responses. This difference was significant over two decades of flash intensities and widened with each incremental increase in flash intensity (p-values ranging from 0.04 to 0.005; Fig. 4M). Further description of ERG kinetics involved comparing the rate of rise for the a- and b-waves. The b-waves recorded from wt mice rose on average two-fold faster than b-waves measured from RIBEYE-ko mice (p-values ranging from 0.04 to 0.009; Fig. S2F). Finally, there was no difference between genotypes when it came to the rate of rise for the a-waves (Fig. S2G). These findings arguably show that ribbonless rods maintained an anemic glutamate gradient across their synapses, which was unable to inhibit a large cohort of postsynaptic rod bipolars; thus, a pause in release was not noticed.

## Discussion

The idealized functionality of the rod's synaptic architecture is to equalize release sites (Rao-Mirotznik et al., 1998). At the cat rod synapse the shortest and longest distances between the ribbon and dendrite averaged 130 and 640 nm, respectively (Rao-Mirotznik et al., 1995). These distances are estimated to create peak synaptic glutamate concentrations that vary by 100-fold, which is arguably too much variability for an ionotropic GluR synapse to utilize quantal signaling (Rao-Mirotznik et al., 1998). To counter this, ON-bipolars express high affinity mGluR6 receptors that have an EC<sub>50</sub> for glutamate that is ~10  $\mu$ M, which are much

higher affinity than iGluRs (see references within: Rao-Mirotnik et al., 1998; DeVries et al., 2006); furthermore, the mGluR6 cascade is prone to saturate (for review, Field and Sampath, 2017). These features may enable release events from different distances to have equal effect on the postsynapse. In the current study, the results show that a rod ribbon emptied its RRP in a single kinetic phase with a  $\tau_{\text{depletion}}$  of  $\sim 0.4$  msec (Fig. 3A), and the size of the RRP was equally large ( $\sim 92$  SVs) when rods were filled with 0.5 or 10 mM EGTA (Fig. 3B). The ultrafast rate of depletion strongly suggests that only primed SVs were released (Neher and Brose, 2018). Since the RRP fused as a single exponential phase and RRP size was not altered by changing intracellular EGTA levels, we suggest that the SVs are uniformly primed and within nanometers from  $\text{Ca}_v$ s channels.

The presumed stretch of release sites at the base of a mouse rod ribbon has a contour length of  $1.6 \mu\text{m}$  (measured from RIBEYE profiles; Grabner et al., 2015;  $1.7 \mu\text{m}$  EM-FIB, Hagiwara et al., 2018). Two separate analyses of EM tomograms estimated  $\sim 60$  (Zampighi et al., 2011) and  $\sim 77$  (Cooper et al., 2012) docked SVs at the ribbon base. These values are slightly less than the maximal, calculated number of 86 SVs that can be packed in this region (Grabner et al., 2015) (see schematic in Fig. 4N). The physiological measurements indicate  $\sim 92$  SVs in the RRP (Fig. 3B), which is 6 to 20 % greater than the calculated and measured number of SVs at the ribbon's base, respectively. The correlation between the anatomy and evoked responses supports the notion that the rod's large ribbon AZ spans the length of the crescent-shaped ribbon. The synaptic, mathematical models outlined above conclude that a minimal steady release rate  $\geq 40 \text{ SVs}\cdot\text{s}^{-1}$  is needed to keep the rod ON-bipolar pathway continually activated (Rao-Mirotnik et al., 1998; Hasegawa et al., 2006). We find that the rod ribbon release rate is  $288 \text{ SV}\cdot\text{s}^{-1}$  during a sustained, strong depolarization to  $-18 \text{ mV}$ . Assuming each of the 92 SV release sites participate equally during sustained release, then each site refills at 3 Hz. At a more physiological membrane voltage close to  $V_{1/2}$  there should be sufficient  $\text{Ca}^{2+}$  influx to sustain  $> 40 \text{ SV}\cdot\text{s}^{-1}$ , which translates to a turnover rate of  $\sim 0.40$  Hz per release site.

Comparing results from mouse rods to studies carried out on isolated Mb1 bipolars highlights differences in the timing of SV fusion. A subpopulation of Mb1 SVs fuse with a  $\tau_{\text{ultrafast}} \sim 0.5$  msec (Heidelberger et al., 1994; Mennerick and Matthews, 1996; Burrone et al., 2002; Palmer et al., 2003), which are rate limited by  $\text{Ca}_v$  channel activation kinetics ( $\tau \sim 0.6$  msec at  $-10 \text{ mV}$ , Mennerick and Matthews, 1998), and their release is unimpeded by elevated intracellular  $\text{Ca}^{2+}$ -buffering (5 mM EGTA) (Mennerick and Matthews, 1996). An additional

population of SVs are considered to reside at greater distances from  $\text{Ca}_v$  channels, because they only enter the RRP when intracellular  $\text{Ca}^{2+}$ -buffering is reduced (0.1 mM EGTA) (Burrone et al., 2002). The heterogeneity in the Mb1's primed SV release kinetics (Grabner and Zenisek, 2013) is not observed in the mouse rod experiments. Though the mouse rod RRP of SVs are tightly and uniformly coupled to  $\text{Ca}_v$  channels, we find that facilitation of  $\text{Ca}_v$  channel activation kinetics occurs on a timescale that accelerates the rate of fusion. In response to 0.5 msec voltage steps, the RRP was depleted by 50 % with 0.5 mM EGTA, but only 4 % of the RRP emptied with 10 mM EGTA (Fig. 3Bi). The faster release onset is attributed to the acceleration of  $\text{Ca}_v$  channel activation kinetics in 0.5 mM EGTA (Fig. 2E), which enhanced  $Q_{\text{Ca}}$  selectively at 0.5 msec (Fig. 3D and 3H). Interestingly, Burrone et al. (Burrone et al., 2002) showed something very similar with respect to release, specifically a tail-current released 50 % of the RRP when the Mb1 bipolars were loaded with 0.1 mM EGTA, and with higher  $\text{Ca}^{2+}$  buffering (endogenous) the tail-current released only 5 % of the RRP. They attributed the enhanced rate of release to the expansion of the  $\text{Ca}^{2+}$ -domain, but differences in  $I_{\text{Ca}}$  were not reported.

Auditory hair cells also support a robust form of facilitation when they are pre-conditioned with elevated, free intracellular  $\text{Ca}^{2+}$ , which is achieved by pre-depolarizing the cell and/or lowering intracellular  $\text{Ca}^{2+}$ -buffering. Release facilitation was characterized by shorter onset latencies and higher release synchrony (Cho et al., 2011; Goutman and Glowatzki, 2011). Notably, rat inner hair cells (IHCs) showed facilitation of  $I_{\text{Ca}}$  onset, but without a change in steady- $I_{\text{Ca}}$  amplitude (Goutman and Glowatzki, 2011), similar to what we report for rods, while frog HCs did not exhibit a change in  $I_{\text{Ca}}$  onset (Cho et al., 2011). These studies show that mammalian IHCs (Goutman and Glowatzki, 2011) and rods accelerate  $\text{Ca}_v$  channel opening (this study), possibly via elevating basal  $\text{Ca}^{2+}$ , which expedites release. This suggests that release is limited by  $\text{Ca}_v$  channel activation kinetics. In contrast, frog HCs (Cho et al., 2011) and Mb1 bipolars (Burrone et al., 2002) accelerate release through a distinct process that may involve a  $\text{Ca}^{2+}$ -dependent priming step or differences in the spatial coupling between  $\text{Ca}_v$  channels and SVs, respectively.

To further test the ribbon-centric release model, evoked SV turnover was studied in ribbonless rods. Here the RRP was whittled down to 24 SVs, compared to 92 SVs in wt rods (Fig. 4A). Since the extent of release was nearly identical with high and low intracellular EGTA concentrations, the RRP formed by ribbonless rods is tightly coupled to the  $\text{Ca}_v$  channels as in wt rods (Fig. 4B). The ribbonless RRP may originate from the AZ territory

where the base of the ribbon and arciform density are normally located in wt rods (depicted schematically in Fig. 4N and 4O). The density of SVs in this region amounted to 40 % of the normal number of SVs present in wt rods (Maxeiner et al., 2016), and the length of the horseshoe-shaped  $\text{Ca}_v1.4/\text{RIM2}$  profiles were reduced by 50 % (Dembla et al., 2020). Thus, a 50 % loss of AZ area, and only 40 % the normal density of SVs, can account for the deficiencies in the size of the RRP. Another potential source of SVs are the synaptic ridges that run vertically some  $\sim 200$  nm from the base of the ribbon, and amount to  $\sim 300$  SVs in wt rods (Zampighi et al., 2011). Their contribution to evoked responses is likely minor in wt rods, because changing  $\text{Ca}^{2+}$ -buffering did not alter pool size, which argues against a distant extra-ribbon source of SVs (see schematics in Fig. 4N and O). Furthermore, rather than supporting release, the ridges are associated with endocytotic structures and the related molecular markers for endocytosis (Wahl et al., 2013; Fuchs et al., 2014; for review Moser et al., 2019). Taken together, it is possible that wt rods form an RRP from  $\sim 70$  SV-release sites that are ribbon-dependent, and  $\sim 20$  additional SVs are within the AZ, but independent of the ribbon (Fig. 4O). In contrast, experiments on salamander rods that acutely disrupted ribbon AZs by photo-damaging them, showed that  $\Delta C_m$  following a 25 msec depolarization was reduced by 50 % after photo-damage, but longer depolarizations to 200 msec were similar to control (non-damaged) responses (Chen et al., 2013). This was interpreted as salamander rods forming a large extra-ribbon RRP of SVs, which fits nicely with the observations that they have multiple kinetic phases of release (Kreft et al., 2003; Rabl et al., 2005). In addition, salamander rods express 5 to 7 ribbons per terminal, which may create more release heterogeneity between ribbons. Mouse rods are comparatively less complex, expressing only a single ribbon that empties in a single ultrafast step.

In this study we also observed that wt peak- $I_{\text{Ca}}$  decayed by a third with a  $\tau$  of 19 msec, and this occurred with 10 mM EGTA in the pipette. Upon repolarization, the  $I_{\text{Ca}}$  traces approached baseline in  $< 1$  msec (Fig. 2C, 2G, 3F and 4Ei), which fits the description of  $\text{Ca}_v$  channel deactivation rather than involvement of  $\text{Ca}^{2+}$ -activated currents. This degree of  $I_{\text{Ca}}$  inactivation was not observed in salamander rods (Bader et al., 1982), and measurements of  $I_{\text{Ca}}$  from porcine (Cia et al., 2005) and ground squirrel rods (Li et al., 2010) did not report  $I_{\text{Ca}}$  inactivation. However, the charge carrier used in one study was 2 mM  $\text{Ba}^{2+}$  (porcine rods) and in the other study 10 mM BAPTA was used to buffer  $\text{Ca}^{2+}$  (squirrel rods), which eliminate a likely candidate mechanism:  $\text{Ca}^{2+}$ -dependent inactivation (CDI). There is growing evidence that heterologously expressed human  $\text{Ca}_v1.4$  in HEK cells can produce CDI (Haeseleer et al., 2016) that is activated by PKA, which causes an increase in peak- $I_{\text{Ca}}$

amplitude (enhanced open probability) that inactivates over time (Sang et al., 2016). Second, raising the recording temperature from 23°C to 37°C has been reported to strongly increase peak- $I_{Ca}$  amplitude (by 3-fold) and accelerate voltage-dependent inactivation (VDI) of  $Ca_v1.4$  currents in HEK cells (by 50-fold) (Peloquin et al., 2008, with 20 mM BaCl<sub>2</sub>). We point out that previous  $I_{Ca}$  measurements from mouse rods at 28°C (Grabner et al., 2015) generated ~50 % less peak- $I_{Ca}$  amplitude than what was observed in the current study (~31°C) and another recent study performed at a higher temperature (Wang et al., 2017; Hagiwara et al., 2018). Future studies will need to further assess whether CDI and/or VDI are involved, and more directly test if inactivation is temperature-dependent.

Both of the  $Ca_v$  channel gating phenomena observed in wt rods were eliminated in ribbonless rods.  $I_{Ca}$  activation kinetics measured with 10 mM EGTA in the pipette showed slower activation kinetics in wt than ribbonless rods (Fig. 4D and Table S2), and inactivation was only observed in wt rods (Fig. 2F and 4Ei). Given the steady- $I_{Ca}$  amplitude measured from wt and ko rods were similar, there were arguably comparable numbers of open channels at ~30 msec; however, ribbonless rods appear to lack a transient enhancement in  $I_{Ca}$  (channel open probability). Since normal levels of  $Ca_v1.4$  ( $\alpha1F$ -subunit) protein (as well as RIM2 $\alpha$ ) are expressed in retina from RIBEYE-ko mice (Maxeiner et al., 2016), it is not surprising that the different genotypes have comparable steady- $I_{Ca}$  amplitudes. What has been disrupted in ribbonless rods are the horseshoe-shaped AZ profiles for  $Ca_v1.4$  ( $\alpha1F$ ) and RIM2 $\alpha$ , which are 50 % shorter in length than wt AZs (Maxeiner et al., 2016; Dembla et al., 2020). Since loss of interactions between  $Ca_v1.4$  and AZ interacting partner RIM2 $\alpha$  reduced rod peak- $I_{Ca}$  by 80 % (Grabner et al., 2015), it's likely that removing the ribbon impaired these facilitatory interactions.

Our study provides new insight into the biophysics of SV fusion at mammalian rod ribbons. The results demonstrate that the rod ribbon creates multiple release sites with similar release probability in response to a strong stimulation. This is driven by  $Ca_v$  channels that activate at ultrafast rates. The coupling between  $Ca_v$  channels and SVs is on a nano-scale, and no signs of heterogeneity in spatial coupling were apparent. Instead release heterogeneity arose for  $Ca_v$  channel facilitation, which was specific to the timing of release onset. These features were dependent on the synaptic ribbon, as ribbonless rods lacked  $Ca_v$  channel facilitation and the RRP was greatly scaled down. Future studies should attempt to determine the functional stoichiometry of a release site, starting with the following questions: how many  $Ca_v$  channels open to trigger a SV(s) to fuse, what mechanisms impact release probability

(i.e., PKA), and is release site uniformity maintained when weaker depolarizations are used. Better insight into these matters will further our understanding of how rods convert depolarizations into synaptic signals, and ultimately how the mammalian rod pathway encodes object motion and position (Tikidji-Hamburyan et al., 2017; Field et al., 2019).



## Materials and Methods

**Animal handling.** Animals were handled in accord with institutional and national animal care guidelines. The *ribeye* knockout mice (Maxeiner et al., 2016) were a kind gift from Frank Schmitz and Stefan Maxeiner (University of Saarland). They were maintained on a C57BL6/J background and crossed as *ribeye*<sup>-/+</sup>. Wild type and ko littermates, male or female, and between 3 and 6 months of age were used for experiments during the daylight phase of the day/night cycle.

**Electrophysiology.** Retinae were dissected at an ambient temperature of 18-20°C and then submersed in mouse extracellular solution (MES) with a low Ca<sup>2+</sup> concentration that had the following composition (in mM): 135 NaCl, 2.5 KCl, 0.5 CaCl<sub>2</sub>, 1 MgCl<sub>2</sub>, 10 glucose, 15 HEPES, and pH adjusted to 7.35 with NaOH and an osmolarity of 295 mOsm. Dissected portions of retina were absorbed onto pieces of nitrocellulose membrane mounted onto glass with the vitreal side the retina contacting the membrane. The sclera and pigment epithelium were from the exposed surface of retina and then ~200 µm thick slices were made with a custom built tissue chopper. Immediately after slicing, the retinal sections (attached to the nitrocellulose membrane) were transferred to the recording chamber and arranged to be viewed in vertical cross section to optimize resolution of the OPL. Slices were washed continually with low Ca<sup>2+</sup> MES for approximately 5 minutes as they equilibrated to an ambient temperature of 30° to 32°C, and then the Ca<sup>2+</sup> was increased to 2 mM.

The intra- and extra-cellular recording solutions have been described previously (Grabner et al., 2015), and a few modifications were made to improve the I<sub>Ca</sub> measurements. To further block a delayed rectifier, outward K<sup>+</sup>-current (Cia et al., 2005), the concentration of TEA was increased to 20 mM in the intrac- and to 35 mM in the extracellular solutions. In addition, Cs<sup>+</sup> replaced intracellular K<sup>+</sup>. Next, a glutamate transporter Cl<sup>-</sup>-current was previously blocked with high concentrations of DL-TBOA, 350 µM (Grabner et al., 2016), which is a non-selective EEAT blocker. In the current study we used TFB-TBOA, which is a high affinity blocker for EEAT1-3, at a concentration of 3 µM (TOCRIS). It showed better stability over time, and far greater potency than 350 µM DL-TBOA (Grabner et al., 2016). The terminals have an I<sub>h</sub> current (Hagiwara et al., 2018) that was blocked by adding 5 mM CsCl to the extracellular solution (Bader et al., 1982). Finally, extracellular HEPES was elevated to 15 mM to block inhibitory proton feedback onto Ca<sub>v</sub> channels (find reference in: Grabner et al., 2015). In the end the extracellular recording solution had the following reagents (mM): 105 NaCl, 2.5 KCl, 35 TEA-Cl, 5 CsCl, 2 CaCl<sub>2</sub>, 1 MgCl<sub>2</sub>, 0.003 TFB-

TBOA, 15 HEPES, and pH adjusted to 7.35 with NaOH, and a final osmolarity between 290 to 295 mOsm. The intracellular solution with 10 mM EGTA consisted of the following reagents (mM): 105 CsCH<sub>3</sub>SO<sub>4</sub>, 20 TEA-Cl, 1 MgCl<sub>2</sub>, 5 MgATP, 0.2 NaGTP, 10 HEPES, 10 EGTA, pH adjusted to 7.30 with CsOH to an osmolarity of 285 to 290 mOsm. To balance the osmolarity when EGTA was lowered to 0.5 mM, CsCH<sub>3</sub>SO<sub>4</sub> was raised to 112 mM. The theoretical liquid junction potentials created between the extracellular recording solution and intracellular solutions were: 8.9 and 9.6 mV, for 10 and 0.5 mM EGTA, respectively. The voltage-clamp data presented here has not corrected for the junction potential; thus, the actual applied voltages are shift by ~ -9 to -10 mV from what is stated in the manuscript.

Whole-cell patch-clamp measurements were made with a HEKA EPC-10 amplifier equipped with Patchmaster software (Lambrecht, Pfalz, Germany). We used the software's 'sine+dc' lock-in operation mode to monitor changes in membrane capacitance, conductance, and series resistance. Whole-cell electrodes were fabricated from thick-wall glass capillary tubes, and their tip region was coated with Sylgard (Dow Corning). Pipette resistance was 9 to 11 MOhms. The cell's voltage was held at -70 mV around which a 2 kHz sine wave with a 50 mV peak-to-peak amplitude (-95 to -45 mV) was applied. The lock-in outputs were sampled at 20 kHz and filtered online with the low-pass  $f_c$  set to 2.9 kHz. The I-V<sub>step</sub> protocols were sampled at 50 kHz and filtered online with the low-pass  $f_c$  set to 10 kHz.

Patch-clamp recordings in this study targeted rod soma in the OPL, which contain the ribbon in the soma compartment, referred to as the 'soma-ribbon' configuration (Hagiwara et al., 2018). Immediately before making the on-cell seal, the extracellular solution was exchanged to an MES with 2.0 mM Ca<sup>2+</sup> and TEA/Cs/TBOA. After gaining whole-cell access, rods were held at a  $V_m$  of -70 mV. The cells were infused for 30 to 40 s before the evoked release protocols began, which entailed a sequence of 5 or 7 depolarizations with stimulations given at 8 s intervals. Evoked release was studied within the first 2 minutes, and then I-V protocols were performed afterwards. The passive electrical properties of the soma-ribbon measured in voltage-clamp were on average as follows,  $R_{series}$ :  $29.7 \pm 0.6$  M $\Omega$  and whole-cell capacitance  $C_m$ :  $1.02 \pm 0.03$  pF; yielding a membrane time constant  $\tau_{RC} \sim 30$   $\mu$ sec (see Table S1 and Fig 1B). Recordings were made at an ambient temperature of 30 to 32°C. Almost all recordings were made within 30 to 45 minutes after slicing, and typically 1 to 2 successful recordings (cells) per mouse.

Data analysis. The evoked  $\Delta C_m$  was assessed as outlined in Figure 1H and 1I. Segments of the  $C_m$  trace, 50 msec in length, before and after depolarization were averaged

and the difference equaled the evoked  $\Delta C_m$ ;  $\Delta G_m$  and  $\Delta G_s$  were calculated in the same way. Since  $G_m$  is influenced by  $Cl^-$ -currents arising from  $Ca^{2+}$ -activated TMEM16A/B channels and the glutamate transporter, the following precautions were taken. For experiments with 0.5 mM EGTA in the intracellular solution, the post-depolarization segment was averaged after  $I_{Cl(Ca)}$  relaxed, 75 msec after the end of the stimulation. Next, TFB-TBOA was used to block the glutamate transporter tail-currents (concentration described above). Finally, lock-in amplifier outputs were monitored between depolarization episodes, and this was done by taking 100 msec sine wave sweeps (Fig. 1H), and the difference between 10 msec windows averaged at the start (time point: 5 to 15 msec) and end (t: 85 to 95 msec) of the 100 ms sweeps were treated as baseline/between stimulation  $\Delta$  values (see Fig. 1E).

The  $I_{Ca}$  amplitude and activation time constant were determined by fitting the onset of the inward membrane current with a single exponential. When 0.5 or 10 mM EGTA was used, fits started after a 200 to 300  $\mu$ sec delay from the start of  $V_{step}$ , and the fit ended approximately 3 msec later (see Fig. 2Aiv). The exception was when 0.5 mM EGTA was used and  $V_{step}$ 's were made more positive than  $-20$  mV, which accelerated  $I_{Cl(Ca)}$  onset (Fig. 1Ci). This left 1 to 2 msec to fit peak- $I_{Ca}$  when  $V_{step}$  was  $-10$  to  $+30$  mV. The  $E_{Cl}$  is predicted to be  $-51$  mV, and after adding the liquid junction potential (9.6 mV), the  $E_{Cl}$  was estimated to be  $\sim -41$  mV. Finally, the I-V relationships were fitted with a Boltzmann equation:  $I = I_{max} * (I_{min} - I_{max}) / (1 + \exp((V_m - V_{1/2})/k))$ , and a modified form:  $I = G_{max} * (V_m - V_{rev}) / (1 + \exp(-(V_m - V_{1/2})/k))$ , where  $I$  is the peak current,  $V_m$  is the membrane voltage,  $V_{1/2}$  is the voltage for half activation,  $V_{rev}$  is the reversal potential,  $G_{max}$  is the maximal conductance, and  $k$  is the slope factor. Fitting and statistical analysis were performed with Origin software (OriginLab Corporation). All experimental values are given as mean  $\pm$  SE.

## ERG recordings

Mice were dark adapted overnight. They were anesthetized with an intraperitoneal injection of ketamine (0.125 mg/g) and xylazine (2.5  $\mu$ g/g), and pupils dilated with 1% atropine sulfate. A AgCl wire ring-electrode was placed on the cornea, and electrical contact was made with a NaCl saline solution, plus methylcellulose to maintain moisture. A needle reference electrode was inserted subcutaneously above the nose, and a ground electrode was inserted near the tail. A custom-designed Ganzfield illuminator with 25 white LEDs was used to deliver 0.1 msec light flashes every 5 sec, which were incrementally increased in intensity from 0.0003 to 0.278  $cds/m^2$  (calibrated with a Mavolux, IPL 10530). Recorded potentials were amplified,

low-pass filtered at 8 kHz, and sampled at a rate of 24 kHz. Ten responses were averaged per light intensity. The ergs were low-pass filtered using a FFT set to a corner-frequency of 400 Hz or 20 Hz for measurement of a- or b-wave parameters, respectively. All analysis were performed with Origin software (OriginLab Corporation).

**Converting  $\Delta C_m$  into the number of fusing vesicles.** To calculate the capacitance per vesicle we relied on published data. Single SV fusion events measured from mouse inner hair cells have an average  $C_m$ : 40.2 aF and SV diameter of 36.9 nm (Grabner and Moser, 2018). Mouse rods have smaller SVs with an average diameter: 32.5 nm (Grabner et al., 2015). The calculated  $C_m$  per mouse rod SV is 35.4 aF.

- Bader CR, Bertrand D, Schwartz EA (1982) Voltage-activated and calcium-activated currents studied in solitary rod inner segments from the salamander retina. *The Journal of physiology* 331:253-284.
- Becker L, Schnee ME, Niwa M, Sun W, Maxeiner S, Talaei S, Kachar B, Rutherford MA, Ricci AJ (2018) The presynaptic ribbon maintains vesicle populations at the hair cell afferent fiber synapse. *eLife* 7.
- Behrens C, Schubert T, Haverkamp S, Euler T, Berens P (2016) Connectivity map of bipolar cells and photoreceptors in the mouse retina. *eLife* 5.
- Burrone J, Neves G, Gomis A, Cooke A, Lagnado L (2002) Endogenous calcium buffers regulate fast exocytosis in the synaptic terminal of retinal bipolar cells. *Neuron* 33:101-112.
- Cao LH, Luo DG, Yau KW (2014) Light responses of primate and other mammalian cones. *Proceedings of the National Academy of Sciences of the United States of America* 111:2752-2757.
- Chen M, Van Hook MJ, Zenisek D, Thoreson WB (2013) Properties of ribbon and non-ribbon release from rod photoreceptors revealed by visualizing individual synaptic vesicles. *The Journal of neuroscience : the official journal of the Society for Neuroscience* 33:2071-2086.
- Cho S, Li GL, von Gersdorff H (2011) Recovery from short-term depression and facilitation is ultrafast and Ca<sup>2+</sup> dependent at auditory hair cell synapses. *The Journal of neuroscience : the official journal of the Society for Neuroscience* 31:5682-5692.
- Cia D, Bordaïs A, Varela C, Forster V, Sahel JA, Rendon A, Picaud S (2005) Voltage-gated channels and calcium homeostasis in mammalian rod photoreceptors. *Journal of neurophysiology* 93:1468-1475.
- Cooper B, Hemmerlein M, Ammermuller J, Imig C, Reim K, Lipstein N, Kalla S, Kawabe H, Brose N, Brandstatter JH, Varoqueaux F (2012) Munc13-independent vesicle priming at mouse photoreceptor ribbon synapses. *The Journal of neuroscience : the official journal of the Society for Neuroscience* 32:8040-8052.
- Dembla E, Dembla M, Maxeiner S, Schmitz F (2020) Synaptic ribbons foster active zone stability and illumination-dependent active zone enrichment of RIM2 and Cav1.4 in photoreceptor synapses. *Scientific reports* 10:5957.
- DeVries SH, Li W, Saszik S (2006) Parallel processing in two transmitter microenvironments at the cone photoreceptor synapse. *Neuron* 50:735-748.
- Dolphin AC, Lee A (2020) Presynaptic calcium channels: specialized control of synaptic neurotransmitter release. *Nature reviews Neuroscience* 21:213-229.
- Field GD, Sampath AP (2017) Behavioural and physiological limits to vision in mammals. *Philosophical transactions of the Royal Society of London Series B, Biological sciences* 372.
- Field GD, Uzzell V, Chichilnisky EJ, Rieke F (2019) Temporal resolution of single-photon responses in primate rod photoreceptors and limits imposed by cellular noise. *Journal of neurophysiology* 121:255-268.
- Fuchs M, Brandstatter JH, Regus-Leidig H (2014) Evidence for a Clathrin-independent mode of endocytosis at a continuously active sensory synapse. *Frontiers in cellular neuroscience* 8:60.
- Goutman JD, Glowatzki E (2011) Short-term facilitation modulates size and timing of the synaptic response at the inner hair cell ribbon synapse. *The Journal of neuroscience : the official journal of the Society for Neuroscience* 31:7974-7981.
- Grabner CP, Zenisek D (2013) Amperometric resolution of a prespike stammer and evoked phases of fast release from retinal bipolar cells. *The Journal of neuroscience : the official journal of the Society for Neuroscience* 33:8144-8158.
- Grabner CP, Moser T (2018) Individual synaptic vesicles mediate stimulated exocytosis from cochlear inner hair cells. *Proceedings of the National Academy of Sciences of the United States of America* 115:12811-12816.
- Grabner CP, Ratliff CP, Light AC, DeVries SH (2016) Mechanism of High-Frequency Signaling at a Depressing Ribbon Synapse. *Neuron* 91:133-145.

- Grabner CP, Gandini MA, Rehak R, Le Y, Zamponi GW, Schmitz F (2015) RIM1/2-Mediated Facilitation of Cav1.4 Channel Opening Is Required for Ca<sup>2+</sup>-Stimulated Release in Mouse Rod Photoreceptors. *The Journal of neuroscience : the official journal of the Society for Neuroscience* 35:13133-13147.
- Grimes WN, Baudin J, Azevedo AW, Rieke F (2018) Range, routing and kinetics of rod signaling in primate retina. *eLife* 7.
- Grunert U, Martin PR (2020) Cell types and cell circuits in human and non-human primate retina. *Progress in retinal and eye research*:100844.
- Haeseleer F, Williams B, Lee A (2016) Characterization of C-terminal Splice Variants of Cav1.4 Ca<sup>2+</sup> Channels in Human Retina. *The Journal of biological chemistry* 291:15663-15673.
- Hagiwara A, Kitahara Y, Grabner CP, Vogl C, Abe M, Kitta R, Ohta K, Nakamura K, Sakimura K, Moser T, Nishi A, Ohtsuka T (2018) Cytomatrix proteins CAST and ELKS regulate retinal photoreceptor development and maintenance. *The Journal of cell biology* 217:3993-4006.
- Hasegawa J, Obara T, Tanaka K, Tachibana M (2006) High-density presynaptic transporters are required for glutamate removal from the first visual synapse. *Neuron* 50:63-74.
- Heidelberger R, Heinemann C, Neher E, Matthews G (1994) Calcium dependence of the rate of exocytosis in a synaptic terminal. *Nature* 371:513-515.
- Jean P, Lopez de la Morena D, Michanski S, Jaime Tobon LM, Chakrabarti R, Picher MM, Neef J, Jung S, Gultas M, Maxeiner S, Neef A, Wichmann C, Strenzke N, Grabner C, Moser T (2018) The synaptic ribbon is critical for sound encoding at high rates and with temporal precision. *eLife* 7.
- Koike C, Obara T, Uriu Y, Numata T, Sanuki R, Miyata K, Koyasu T, Ueno S, Funabiki K, Tani A, Ueda H, Kondo M, Mori Y, Tachibana M, Furukawa T (2010) TRPM1 is a component of the retinal ON bipolar cell transduction channel in the mGluR6 cascade. *Proceedings of the National Academy of Sciences of the United States of America* 107:332-337.
- Kreft M, Krizaj D, Grilc S, Zorec R (2003) Properties of exocytotic response in vertebrate photoreceptors. *Journal of neurophysiology* 90:218-225.
- Lagnado L, Schmitz F (2015) Ribbon Synapses and Visual Processing in the Retina. *Annual review of vision science* 1:235-262.
- Li W, Chen S, DeVries SH (2010) A fast rod photoreceptor signaling pathway in the mammalian retina. *Nature neuroscience* 13:414-416.
- Lindau M, Neher E (1988) Patch-clamp techniques for time-resolved capacitance measurements in single cells. *Pflugers Archiv : European journal of physiology* 411:137-146.
- Maxeiner S, Luo F, Tan A, Schmitz F, Sudhof TC (2016) How to make a synaptic ribbon: RIBEYE deletion abolishes ribbons in retinal synapses and disrupts neurotransmitter release. *The EMBO journal* 35:1098-1114.
- McRory JE, Hamid J, Doering CJ, Garcia E, Parker R, Hamming K, Chen L, Hildebrand M, Beedle AM, Feldcamp L, Zamponi GW, Snutch TP (2004) The CACNA1F gene encodes an L-type calcium channel with unique biophysical properties and tissue distribution. *The Journal of neuroscience : the official journal of the Society for Neuroscience* 24:1707-1718.
- Mennerick S, Matthews G (1996) Ultrafast exocytosis elicited by calcium current in synaptic terminals of retinal bipolar neurons. *Neuron* 17:1241-1249.
- Mennerick S, Matthews G (1998) Rapid calcium-current kinetics in synaptic terminals of goldfish retinal bipolar neurons. *Visual neuroscience* 15:1051-1056.
- Mercer AJ, Rabl K, Riccardi GE, Brecha NC, Stella SL, Jr., Thoreson WB (2011) Location of release sites and calcium-activated chloride channels relative to calcium channels at the photoreceptor ribbon synapse. *Journal of neurophysiology* 105:321-335.
- Moser T, Grabner CP, Schmitz F (2019) Sensory processing at ribbon synapses in the retina and the cochlea. *Physiological reviews*.
- Neher E (1986) Concentrations Profiles of Intracellular Calcium in the Presence of a Diffusible Chelator. *Experimental brain research Series* 14:17.

- Neher E, Brose N (2018) Dynamically Primed Synaptic Vesicle States: Key to Understand Synaptic Short-Term Plasticity. *Neuron* 100:1283-1291.
- Palmer MJ, Hull C, Vigh J, von Gersdorff H (2003) Synaptic cleft acidification and modulation of short-term depression by exocytosed protons in retinal bipolar cells. *The Journal of neuroscience : the official journal of the Society for Neuroscience* 23:11332-11341.
- Pangrsic T, Singer JH, Koschak A (2018) Voltage-Gated Calcium Channels: Key Players in Sensory Coding in the Retina and the Inner Ear. *Physiological reviews* 98:2063-2096.
- Peloquin JB, Doering CJ, Rehak R, McRory JE (2008) Temperature dependence of Cav1.4 calcium channel gating. *Neuroscience* 151:1066-1083.
- Rabl K, Cadetti L, Thoreson WB (2005) Kinetics of exocytosis is faster in cones than in rods. *The Journal of neuroscience : the official journal of the Society for Neuroscience* 25:4633-4640.
- Rao-Mirotnik R, Buchsbaum G, Sterling P (1998) Transmitter concentration at a three-dimensional synapse. *Journal of neurophysiology* 80:3163-3172.
- Rao-Mirotnik R, Harkins AB, Buchsbaum G, Sterling P (1995) Mammalian rod terminal: architecture of a binary synapse. *Neuron* 14:561-569.
- Rivlin-Etzion M, Grimes WN, Rieke F (2018) Flexible Neural Hardware Supports Dynamic Computations in Retina. *Trends in neurosciences* 41:224-237.
- Sang L, Dick IE, Yue DT (2016) Protein kinase A modulation of CaV1.4 calcium channels. *Nature communications* 7:12239.
- Sterling P (2013) Some principles of retinal design: the Proctor lecture. *Investigative ophthalmology & visual science* 54:2267-2275.
- Straka H, Baker R (2013) Vestibular blueprint in early vertebrates. *Frontiers in neural circuits* 7:182.
- Thoreson WB, Dacey DM (2019) Diverse Cell Types, Circuits, and Mechanisms for Color Vision in the Vertebrate Retina. *Physiological reviews* 99:1527-1573.
- Tikidji-Hamburyan A, Reinhard K, Storchi R, Dietter J, Seitter H, Davis KE, Idrees S, Mutter M, Walmsley L, Bedford RA, Ueffing M, Ala-Laurila P, Brown TM, Lucas RJ, Munch TA (2017) Rods progressively escape saturation to drive visual responses in daylight conditions. *Nature communications* 8:1813.
- Tsukamoto Y, Omi N (2016) ON Bipolar Cells in Macaque Retina: Type-Specific Synaptic Connectivity with Special Reference to OFF Counterparts. *Frontiers in neuroanatomy* 10:104.
- Tsukamoto Y, Omi N (2017) Classification of Mouse Retinal Bipolar Cells: Type-Specific Connectivity with Special Reference to Rod-Driven All Amacrine Pathways. *Frontiers in neuroanatomy* 11:92.
- Wahl S, Katiyar R, Schmitz F (2013) A local, periaxonal zone endocytic machinery at photoreceptor synapses in close vicinity to synaptic ribbons. *The Journal of neuroscience : the official journal of the Society for Neuroscience* 33:10278-10300.
- Wang Y, Fehlhaber KE, Sarria I, Cao Y, Ingram NT, Guerrero-Given D, Throesch B, Baldwin K, Kamasawa N, Ohtsuka T, Sampath AP, Martemyanov KA (2017) The Auxiliary Calcium Channel Subunit  $\alpha 2\delta 4$  Is Required for Axonal Elaboration, Synaptic Transmission, and Wiring of Rod Photoreceptors. *Neuron* 93:1359-1374 e1356.
- Zampighi GA, Schietroma C, Zampighi LM, Woodruff M, Wright EM, Brecha NC (2011) Conical tomography of a ribbon synapse: structural evidence for vesicle fusion. *PloS one* 6:e16944.

## **Acknowledgements.**

**General:** We would like to thank Stefan Thom for excellent technical assistance with the erg recordings. We thank Drs. Erwin Neher and Jakob Neef for critical feedback on the manuscript.

**Funding:** This work was supported by the Max-Planck-Society (Max-Planck-Fellowship to T.M.) and the DFG through the Leibniz program (to T.M.). **Author contributions:** Experiments were designed, performed and analyzed by C.P.G., and the manuscript was written by C.P.G. and T.M..

**Competing interests:** none



## Supplementary Materials

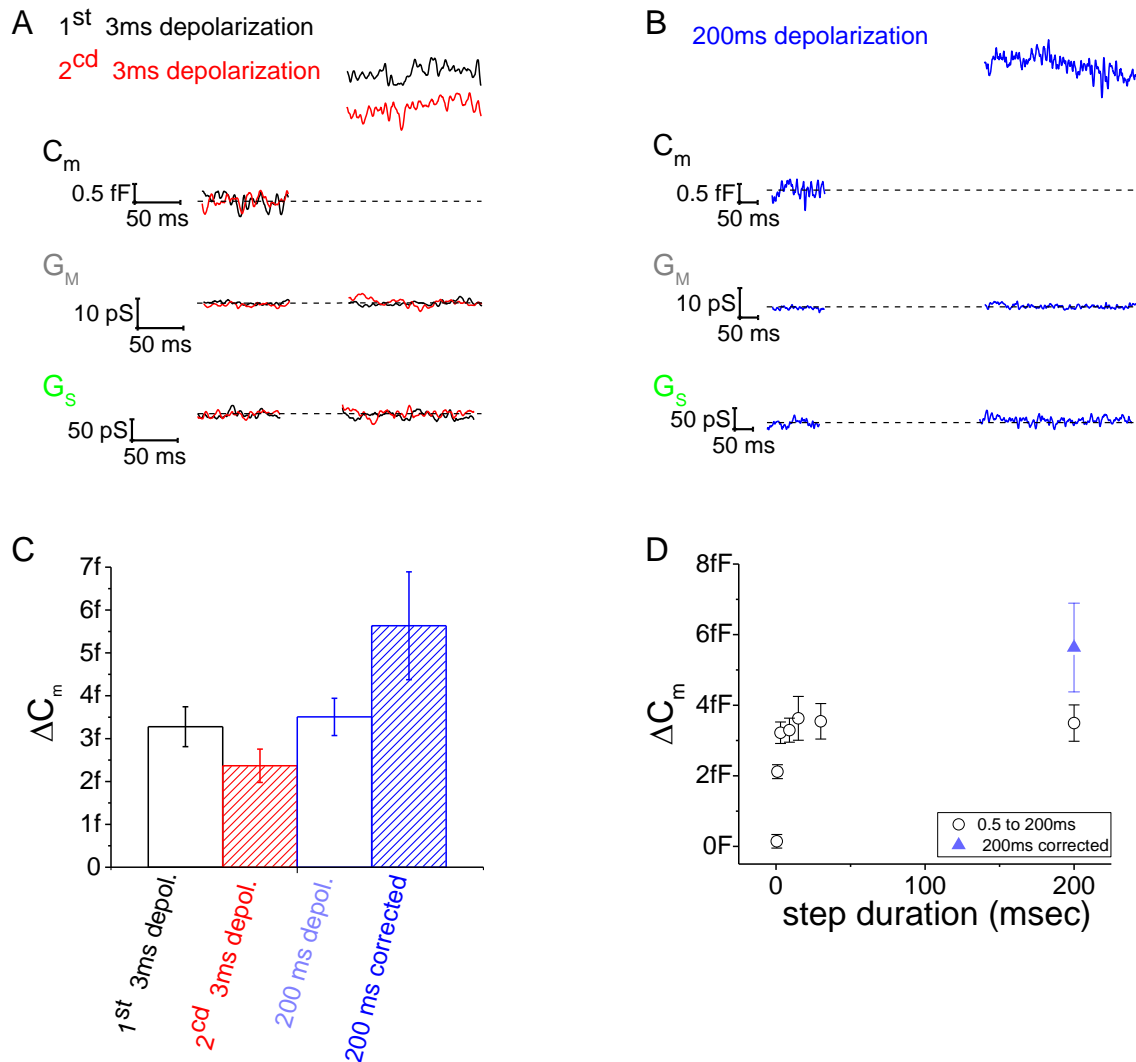

**Figure S1.** Estimation of the continual release rate. The degree of release run down was assessed by comparing 3 msec depolarizations ( $V_{\text{depol}} = -18$  mV) at different time points. The first 3 msec depolarization was given as part of a series of different step durations (as presented in Fig. 1E-J), at approximately 50 to 60 sec into the experiment. The second 3 msec depolarization was given at approximately 130 sec into the experiment, and it preceded the 200 msec depolarization by 12 sec.

(A) The average lock-in output traces are presented for the 1<sup>st</sup> and 2<sup>nd</sup> 3 msec steps (7 cells). (B) The lock-in output traces are presented for the 200 msec steps (7 cells). (C) Presents the average  $\Delta C_m$  results derived from 3 and 200 msec depolarizations. To calculate the 200 msec  $\Delta C_m$  corrected for rundown within recording, the 200 msec  $\Delta C_m$  was divided by the rundown factor:  $((2^{\text{nd}} \text{ 3 msec } \Delta C_m) / (1^{\text{st}} \text{ 3 msec } \Delta C_m))$ .

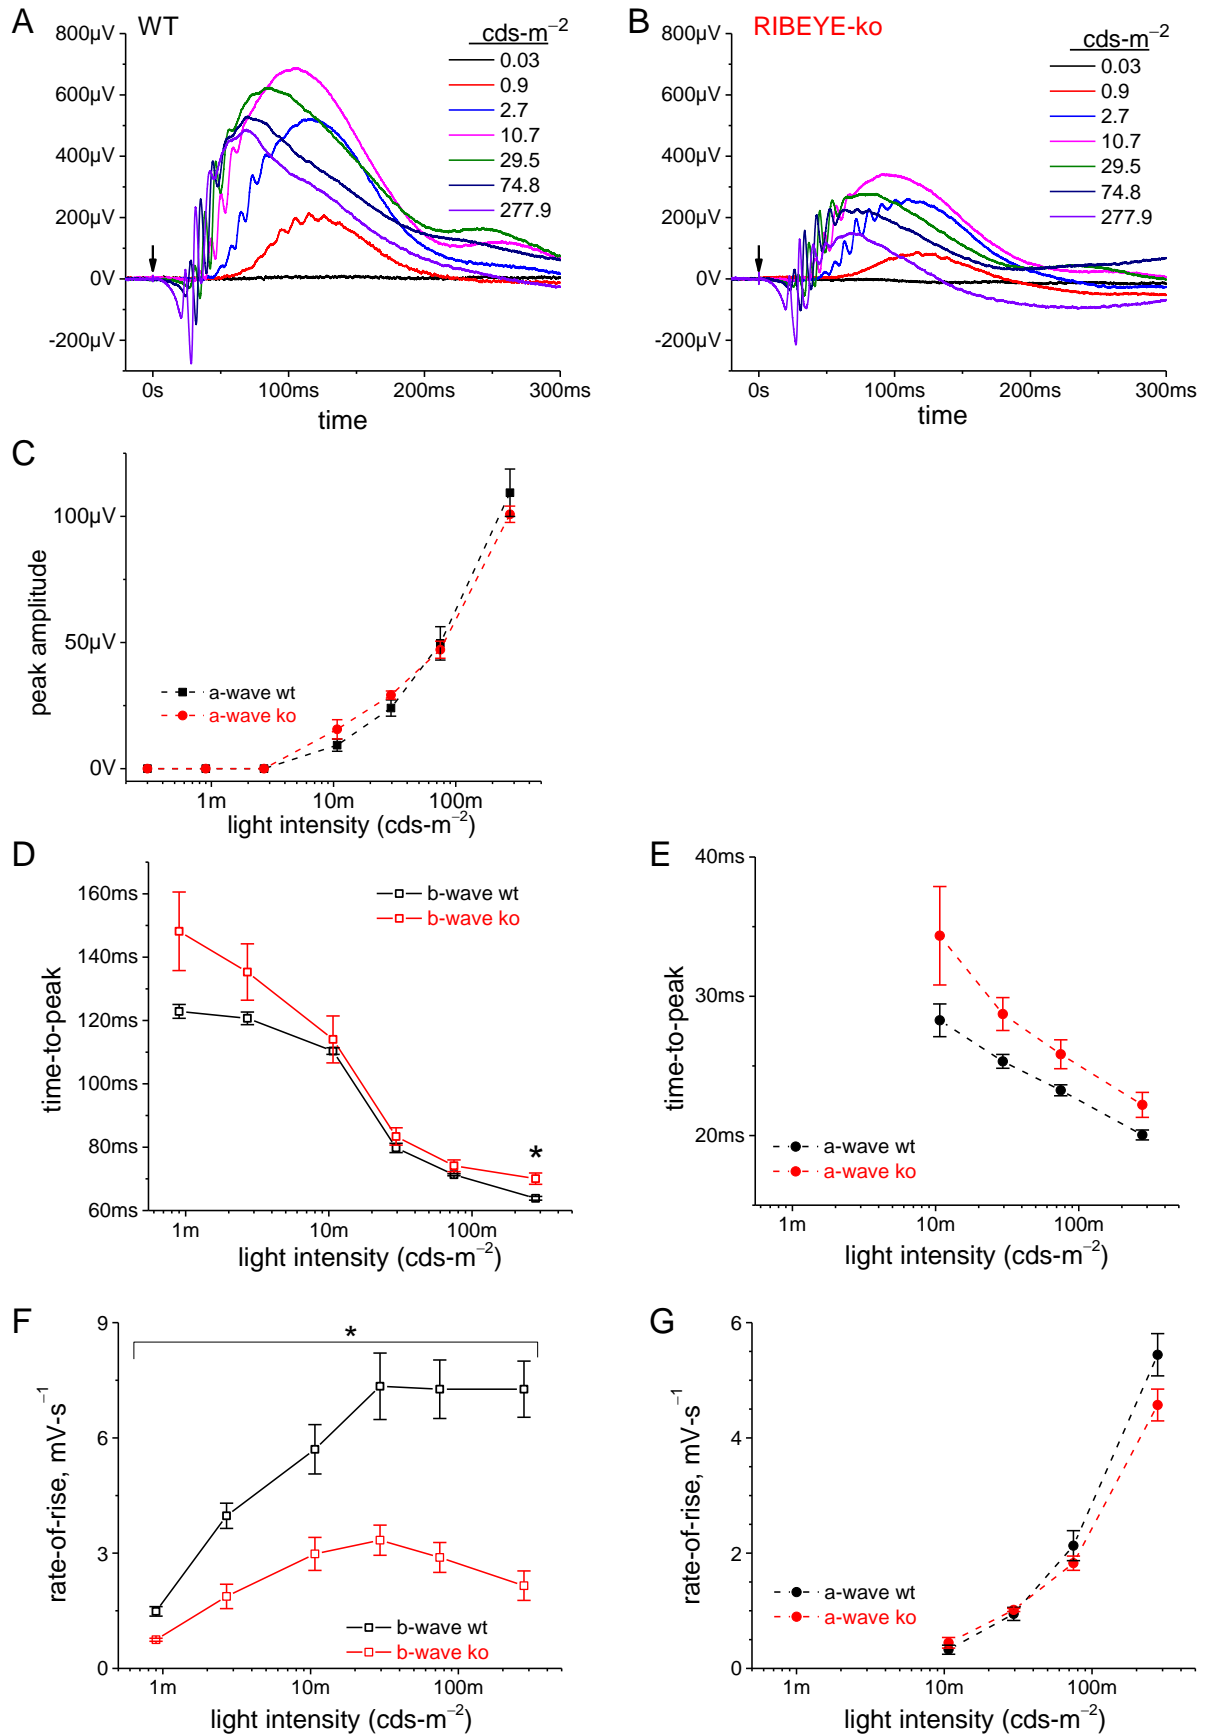

Figure S2

**Figure S2.** Rod driven light responses are suppressed in RIBEYE-ko mice. **(A)** Dark-adapted ERGs recorded from an individual wt mouse. Intensity of the scotopic, dim light flashes are indicated in the graph. The arrow marks the moment of the 0.1 msec light flash. ERGs are presented at full band-width, without offline filtering. **(B)** Dark-adapted ERG recording from an individual ko mouse. **(C)** Plot of ERG a-wave amplitudes over the range of flash intensities, which showed no statistically significant difference between wt and ko mice. See Figure 4M for the b-wave responses. **(D)** As the flash intensity increased, the b-wave time-to-peak shortened. The only statistically significant difference between genotypes was witnessed at the highest flash intensity; \*, p: 0.034. **(E)** As the flash intensity increased, the a-wave time-to-peak shortened. There were no statistically significant differences between genotypes. **(F)** WT b-waves rate-of-rise were significantly greater than ko mice across the full range of flash intensities; \*, p-values: 0.04 to 0.009. **(G)** The a-wave rate-of-rise was not significantly different for the two genotypes. Average responses in C-G were attained from 4 ko and 3 wt mice.

**Table S1.** Whole-cell patch-clamp recording parameters

|                                          | Lockin-Amplifier outputs |                 |                 |              |                              |
|------------------------------------------|--------------------------|-----------------|-----------------|--------------|------------------------------|
| Ribeye Wt<br>0.5mM EGTA<br>(21 cells)    | Cm<br>(Farads)           | Gm<br>(Siemens) | Gs<br>(Siemens) | Ra<br>(MOhm) | Leak at<br>-70mV<br>(Ampere) |
| <i>Mean</i>                              | 974f                     | 67.7p           | 28.3n           | 31.3M        | -4.83p                       |
| <i>SE of mean</i>                        | 39.8f                    | 11.5p           | 2.03n           | 3.74M        | 928f                         |
| <i>Minimum</i>                           | 460f                     | 7.30p           | 14.0n           | 14.8M        | -17.0p                       |
| <i>Median</i>                            | 987f                     | 45.0p           | 28.0n           | 21.5M        | -3.20p                       |
| <i>Maximum</i>                           | 1.35p                    | 220p            | 54.0n           | 88.0M        | 0.00                         |
| Ribeye (-/-)<br>0.5mM EGTA<br>(17 cells) | Cm<br>(Farads)           | Gm<br>(Siemens) | Gs<br>(Siemens) | Ra<br>(MOhm) | Leak at<br>-70mV<br>(Ampere) |
| <i>Mean</i>                              | 1.05p                    | 88.4p           | 32.0n           | 27.1M        | -6.26p                       |
| <i>SE of mean</i>                        | 62.8f                    | 20.5p           | 3.82n           | 2.91M        | 1.61p                        |
| <i>Minimum</i>                           | 679f                     | 15.1p           | 11.2n           | 11.7M        | -20.0p                       |
| <i>Median</i>                            | 948f                     | 49.3p           | 30.8n           | 22.3M        | -2.30p                       |
| <i>Maximum</i>                           | 1.67p                    | 306p            | 71.7n           | 57.7M        | 0.00                         |
| Ribeye Wt<br>10mM EGTA<br>(21 cells)     | Cm<br>(Farads)           | Gm<br>(Siemens) | Gs<br>(Siemens) | Ra<br>(MOhm) | Leak at<br>-70mV<br>(Ampere) |
| <i>Mean</i>                              | 1.01p                    | 58.3p           | 23.2n           | 29.0M        | -3.35p                       |
| <i>SE of mean</i>                        | 20.4f                    | 8.65p           | 1.23n           | 3.64M        | 839f                         |
| <i>Minimum</i>                           | 897f                     | 14.0p           | 12.8n           | 12.8M        | -12.0p                       |
| <i>Median</i>                            | 995f                     | 54.1p           | 23.5n           | 20.9M        | -3.00p                       |
| <i>Maximum</i>                           | 1.28p                    | 137p            | 31.1n           | 68.4M        | 1.50p                        |
| Ribeye (-/-)<br>10mM EGTA<br>(10 cells)  | Cm<br>(Farads)           | Gm<br>(Siemens) | Gs<br>(Siemens) | Ra<br>(MOhm) | Leak at<br>-70mV<br>(Ampere) |
| <i>Mean</i>                              | 974f                     | 39.5p           | 21.9n           | 37.4M        | -3.57p                       |
| <i>SE of mean</i>                        | 162f                     | 34.3p           | 8.16n           | 13.8M        | 3.79p                        |
| <i>Minimum</i>                           | 665f                     | 10.4p           | 9.99n           | 18.9M        | -12.0p                       |
| <i>Median</i>                            | 968f                     | 25.9p           | 21.4n           | 42.0M        | -2.00p                       |
| <i>Maximum</i>                           | 1.21p                    | 111p            | 37.1n           | 51.7M        | -1.00p                       |

**Table S2.** Activation kinetics for Ca<sub>v</sub> currents

0.5 mM versus 10 mM EGTA

| V <sub>step</sub>       | -40mV                         | -30mV                         |                             | -20mV                        |                             | -10mV                        |                     | 0mV                          |                            |
|-------------------------|-------------------------------|-------------------------------|-----------------------------|------------------------------|-----------------------------|------------------------------|---------------------|------------------------------|----------------------------|
|                         | peak-I <sub>Ca</sub><br>(pA)  | peak-I <sub>Ca</sub><br>(pA)  | tau (μs)                    | peak-I <sub>Ca</sub><br>(pA) | tau (μs)                    | peak-I <sub>Ca</sub><br>(pA) | tau (μs)            | peak-I <sub>Ca</sub><br>(pA) | tau (μs)                   |
| wt, 10 EGTA<br>9 cells  | -0.9 ± 0.3                    | -6.2 ± 0.6                    | 1090 ± 151                  | -12.1 ± 0.7                  | 489 ± 42                    | -14.1 ± 0.7                  | 274 ± 36            | -13.0 ± 0.7                  | 184 ± 27                   |
| wt 0.5 EGTA<br>8 cells  | -0.9 ± 0.1                    | -6.1 ± 0.3                    | 545 ± 30<br><b>p: 0.006</b> | -12.2 ± 0.4                  | 309 ± 29<br><b>p: 0.003</b> | -14.1 ± 0.6                  | 202 ± 22<br>p: 0.09 | -13.5 ± 0.4<br>p: 0.52       | 155 ± 34<br>p: 0.51        |
| ko, 10 EGTA<br>5 cells  | -0.5 ± 0.1                    | -3.7 ± 0.7                    | 671 ± 65                    | -7.7 ± 0.8                   | 363 ± 27                    | -9.3 ± 0.7                   | 255 ± 36            | -9.8 ± 0.7                   | 261 ± 35                   |
| ko, 0.5 EGTA<br>7 cells | -1.0 ± 0.1<br><b>p: 0.006</b> | -6.0 ± 0.5<br><b>p: 0.028</b> | 649 ± 67<br><b>p: 0.02</b>  | -9.4 ± 0.7<br>p: 0.13        | 254 ± 42<br><b>p: 0.05</b>  | -11.3 ± 0.9<br>p: 0.10       | 194 ± 17<br>p: 0.18 | -9.7 ± 0.7                   | 140 ± 18<br><b>p: 0.02</b> |

Control versus RIBEYE-ko.

| V <sub>step</sub> | -40mV                        | -30mV                         |                            | -20mV                         |                            | -10mV                          |                     | 0mV                            |                     |
|-------------------|------------------------------|-------------------------------|----------------------------|-------------------------------|----------------------------|--------------------------------|---------------------|--------------------------------|---------------------|
|                   | peak-I <sub>Ca</sub><br>(pA) | peak-I <sub>Ca</sub><br>(pA)  | tau (μs)                   | peak-I <sub>Ca</sub><br>(pA)  | tau (μs)                   | peak-I <sub>Ca</sub><br>(pA)   | tau (μs)            | peak-I <sub>Ca</sub><br>(pA)   | tau (μs)            |
| 10 EGTA<br>wt     | -0.9 ± 0.3                   | -6.2 ± 0.6                    | 1090 ± 151                 | -12.1 ± 0.7                   | 489 ± 42                   | -14.1 ± 0.7                    | 274 ± 36            | -13.0 ± 0.7                    | 184 ± 27            |
| 10 EGTA<br>ko     | -0.5 ± 0.1<br>p: 0.34        | -3.7 ± 0.7<br><b>p: 0.023</b> | 671 ± 65<br><b>p: 0.03</b> | -7.7 ± 0.8<br><b>p: 0.002</b> | 363 ± 27<br><b>p: 0.03</b> | -9.3 ± 0.7<br><b>p: 0.0008</b> | 255 ± 36<br>p: 0.7  | -9.8 ± 0.7<br><b>p: 0.03</b>   | 261 ± 35<br>p: 0.12 |
| 0.5 EGTA<br>wt    | -0.9 ± 0.1                   | -6.1 ± 0.3                    | 545 ± 30                   | -12.2 ± 0.4                   | 309 ± 29                   | -14.1 ± 0.6                    | 202 ± 22            | -13.5 ± 0.4                    | 155 ± 34            |
| 0.5 EGTA<br>ko    | -1.0 ± 0.1<br>p: 0.47        | -6.0 ± 0.5                    | 649 ± 67<br>p: 0.19        | -9.4 ± 0.7<br><b>p: 0.005</b> | 254 ± 42<br>p: 0.3         | -11.3 ± 0.9<br><b>p: 0.02</b>  | 194 ± 17<br>p: 0.78 | -9.7 ± 0.7<br><b>p: 0.0002</b> | 140 ± 18<br>p: 0.7  |

**Note:** Average peak-I<sub>Ca</sub> and activation τ's were made by fitting current responses with a single exponential decay function (see Methods). The voltage-step protocol started at V<sub>rest</sub>: -70 mV, and then stepped for 10 msec to a V<sub>step</sub> value between -80 to +30 mV, in 10 mV increments. Liquid junction potentials were *not* subtracted from the voltage values presented above. The liquid junction potential are predicted to shift the actual membrane voltages by +9 and +10 mV for the intracellular solutions containing 0.5 and 10 mM EGTA, respectively (see Methods).

**Table S3.** Peak- $I_{Ca}$ -Voltage relationship for wild type and RIBEYE-ko rods filled with 0.5 or 10 mM EGTA.

| genotype,<br>EGTA conc.                  | Modified Boltzmann-IV fits     |                        |                         |                   |                                | Boltzmann fits                   |                                 |                             |
|------------------------------------------|--------------------------------|------------------------|-------------------------|-------------------|--------------------------------|----------------------------------|---------------------------------|-----------------------------|
|                                          | $I_{Ca}$ (pA)<br>@-10mV        | $V_{1/2}$<br>(mV)      | $dx$<br>(mV- $e^{-1}$ ) | $V_{rev}$<br>(mV) | $G_{max}$<br>(pA-mV $^{-1}$ )  | $peak-I_{Ca}$<br>(pA)            | $V_{0.5}$<br>(mV)               | $dx$<br>(mV- $e^{-1}$ )     |
| wt, 10 EGTA<br>9 cells                   | -14.1 ± 0.7                    | -24.0 ± 1.3            | -6.2 ± 0.6              | 44.6 ± 2.6        | 0.30 ± 0.02                    | -14.5 ± 0.3                      | -28.7 ± 0.4                     | 4.8 ± 0.4                   |
| wt, 0.5 EGTA<br>8 cells                  | -14.1 ± 0.6                    | -23.2 ± 0.9            | -6.2 ± 0.6              | 46.4 ± 2.6        | 0.29 ± 0.02                    | -14.4 ± 0.2                      | -28.6 ± 0.2                     | 4.7 ± 0.2                   |
| ko, 10 EGTA<br>5 cells                   | -9.3 ± 0.7                     | -22.3 ± 1.9            | -6.9 ± 0.8              | 43.2 ± 2.9        | 0.22 ± 0.02                    | -10.0 ± 0.2                      | -27.3 ± 0.44                    | 5.5 ± 0.4                   |
| ko, 0.5 EGTA<br>7 cells                  | -11.3 ± 0.9<br>p: 0.13         | -25.3 ± 1.1<br>p: 0.17 | -6.3 ± 0.7              | 43.9 ± 3.1        | 0.22 ± 0.02                    | -11.5 ± 0.82<br>p: 0.15          | -30.3 ± 1.1<br>p: 0.053         | 5.2 ± 1.1<br>p: 0.83        |
| <b>Control versus <i>ribeye k.o.</i></b> |                                |                        |                         |                   |                                |                                  |                                 |                             |
| wt 10 EGTA                               | -14.1 ± 0.7                    | -24.0 ± 1.3            | -6.2 ± 0.6              | 44.6 ± 2.6        | 0.30 ± 0.02                    | -14.5 ± 0.3                      | -28.7 ± 0.4                     | 4.8 ± 0.4                   |
| ko 10 EGTA                               | -9.3 ± 0.7<br>p: <b>0.0008</b> | -22.3 ± 1.9<br>p: 0.46 | -6.9 ± 0.8              | 43.2 ± 2.9        | 0.22 ± 0.02<br>p: <b>0.024</b> | -10.0 ± 0.02<br>p: <b>0.0001</b> | -27.3 ± 0.44<br>p: <b>0.033</b> | 5.5 ± 0.4<br>p: <b>0.28</b> |
| wt 0.5 EGTA                              | -14.1 ± 0.6                    | -23.2 ± 0.9            | -6.2 ± 0.6              | 46.4 ± 2.6        | 0.29 ± 0.02                    | -14.4 ± 0.2                      | -28.6 ± 0.2                     | 4.7 ± 0.2                   |
| ko 0.5 EGTA                              | -11.3 ± 0.9<br>p: <b>0.020</b> | -25.3 ± 1.1<br>p: 0.17 | -6.3 ± 0.7              | 43.9 ± 3.1        | 0.22 ± 0.02<br>p: <b>0.029</b> | -11.5 ± 0.82<br>p: <b>0.003</b>  | -30.3 ± 1.1<br>p: 0.18          | 5.2 ± 1.1<br>p: 0.64        |

Notes: Boltzmann were made to average peak- $Ca^{2+}$  currents derived from a voltage step protocol.

The protocol started at  $V_{rest}$ : -70 mV, and then stepped for 10 msec to a  $V_{step}$  value between -80 to +30 mV, in 10 mV increments. Liquid junction potentials were *not* subtracted from the voltage values presented above,  $V_{1/2}$ ,  $V_{rev}$  and  $V_{0.5}$  (see above Table S2).

**Table S4.** Ca<sup>2+</sup>-dependent tail-currents measured with 0.5 mM EGTA in the pipette.

| genotype            | I <sub>Cl(Ca)</sub> @<br>-10 mV<br>(pA) | Modified Boltzmann-IV fits |                             |                          |                                            | Boltzmann fits     |                          |                             |
|---------------------|-----------------------------------------|----------------------------|-----------------------------|--------------------------|--------------------------------------------|--------------------|--------------------------|-----------------------------|
|                     |                                         | V <sub>1/2</sub><br>(mV)   | dx<br>(mV·e <sup>-1</sup> ) | V <sub>rev</sub><br>(mV) | G <sub>max</sub><br>(pA·mV <sup>-1</sup> ) | span<br>(pA)       | V <sub>0.5</sub><br>(mV) | dx<br>(mV·e <sup>-1</sup> ) |
| wt 0.5 EGTA<br>n: 6 | -68 ± 13                                | -20.4 ± 0.5                | -5.55 ± 0.95                | 35.8 ± 3.8               | 1.41 ± 0.44                                | 67 ± 14            | -23.9 ± 0.8              | 3.20 ± 0.19                 |
| ko 0.5 EGTA<br>n: 5 | -27 ± 5<br>p: 0.036                     | -22.8 ± 0.6<br>p: 0.016    | -5.28 ± 0.25<br>p: 0.79     | 34.1 ± 3.0<br>p: 0.73    | 0.70 ± 0.13<br>p: 0.17                     | 27 ± 5<br>p: 0.042 | -27.4 ± 0.8<br>p: 0.013  | 3.52 ± 0.24<br>p: 0.33      |

Notes: Ca<sup>2+</sup>-activated tail-currents were measured following the voltage step protocol used to measure peak-I<sub>Ca</sub> amplitude. The protocol started at V<sub>rest</sub>: -70 mV, and then stepped for 10 msec to a V<sub>step</sub> value between -80 to +30 mV, in 10 mV increments. Tail-currents were measured 3 msec after repolarizing the cell to -70 mV. Liquid junction potentials were *not* subtracted from the voltage values presented above, V<sub>1/2</sub>, V<sub>rev</sub> and V<sub>0.5</sub> (see Table 2 for LJP).
